# Supplementary material
Source: MDPI journal article supplement (https://www.mdpi.com/2304-6740/7/10/121)

# checkCIF/PLATON report

You have not supplied any structure factors. As a result the full set of tests cannot be run.

THIS REPORT IS FOR GUIDANCE ONLY. IF USED AS PART OF A REVIEW PROCEDURE FOR PUBLICATION, IT SHOULD NOT REPLACE THE EXPERTISE OF AN EXPERIENCED CRYSTALLOGRAPHIC REFEREE.

No syntax errors found.      CIF dictionary      Interpreting this report

## Datablock: 4

---

|                 |                             |                                |
|-----------------|-----------------------------|--------------------------------|
| Bond precision: | C-C = 0.0111 A              | Wavelength=0.71075             |
| Cell:           | a=17.2066(5)                | b=13.4578(3)      c=17.4402(4) |
|                 | alpha=90                    | beta=118.3955(8)      gamma=90 |
| Temperature:    | 173 K                       |                                |
|                 | Calculated                  | Reported                       |
| Volume          | 3552.62(16)                 | 3552.61(16)                    |
| Space group     | P 21/c                      | P 1 21/c 1                     |
| Hall group      | -P 2ybc                     | -P 2ybc                        |
| Moiety formula  | C29 H45 Ir2 O P2, C F3 O3 S | C30 H51 F3 Ir2 O4 P2 S         |
| Sum formula     | C30 H45 F3 Ir2 O4 P2 S      | C30 H51 F3 Ir2 O4 P2 S         |
| Mr              | 1005.10                     | 1011.17                        |
| Dx,g cm-3       | 1.879                       | 1.890                          |
| Z               | 4                           | 4                              |
| Mu (mm-1)       | 7.680                       | 7.701                          |
| F000            | 1936.0                      | 1960.0                         |
| F000'           | 1927.14                     |                                |
| h,k,lmax        | 22,17,22                    | 22,17,22                       |
| Nref            | 8137                        | 8112                           |
| Tmin,Tmax       | 0.260,0.315                 | 0.131,0.315                    |
| Tmin'           | 0.065                       |                                |

Correction method= # Reported T Limits: Tmin=0.131 Tmax=0.315  
AbsCorr = MULTI-SCAN

Data completeness= 0.997      Theta(max)= 27.470

R(reflections)= 0.0411( 6327)      wR2(reflections)= wR= 0.0629( 6354)

S = 1.003      Npar= 449

---

```
test-name ALERT alert-type alert-level.
```

 Alert level B

- Alert level C

- Alert level G

```

FORMU01_ALERT_2_G There is a discrepancy between the atom counts in the
    _chemical_formula_sum and the formula from the _atom_site* data.
    Atom count from _chemical_formula_sum: C30 H51 F3 Ir2 O4 P2 S1
    Atom count from the _atom_site data:  C30 H45 F3 Ir2 O4 P2 S1
CELLZ01_ALERT_1_G Difference between formula and atom_site contents detected.
CELLZ01_ALERT_1_G WARNING: H atoms missing from atom site list. Is this intentional?
    From the CIF: _cell_formula_units_Z      4
    From the CIF: _chemical_formula_sum  C30 H51 F3 Ir2 O4 P2 S
    TEST: Compare cell contents of formula and atom site data

```

| atom | Z*formula | cif sites | diff  |
|------|-----------|-----------|-------|
| C    | 120.00    | 120.00    | 0.00  |
| H    | 204.00    | 180.00    | 24.00 |
| F    | 12.00     | 12.00     | 0.00  |
| Ir   | 8.00      | 8.00      | 0.00  |
| O    | 16.00     | 16.00     | 0.00  |
| P    | 8.00      | 8.00      | 0.00  |
| S    | 4.00      | 4.00      | 0.00  |

|                   |                                                   |              |
|-------------------|---------------------------------------------------|--------------|
| PLAT005_ALERT_5_G | No Embedded Refinement Details Found in the CIF   | Please Do !  |
| PLAT042_ALERT_1_G | Calc. and Reported MoietyFormula Strings Differ   | Please Check |
| PLAT244_ALERT_4_G | Low 'Solvent' Ueq as Compared to Neighbors of C32 | Check        |
| PLAT300_ALERT_4_G | Atom Site Occupancy of C28 Constrained at 0.61    | Check        |
| PLAT300_ALERT_4_G | Atom Site Occupancy of C29 Constrained at 0.61    | Check        |
| PLAT300_ALERT_4_G | Atom Site Occupancy of C30 Constrained at 0.39    | Check        |
| PLAT300_ALERT_4_G | Atom Site Occupancy of C31 Constrained at 0.39    | Check        |
| PLAT301_ALERT_3_G | Main Residue Disorder .....(Resd 1 )              | 6% Note      |
| PLAT303_ALERT_2_G | Full Occupancy Atom H45 with # Connections        | 2.00 Check   |
| PLAT779_ALERT_4_G | Suspect or Irrelevant (Bond) Angle(s) in CIF . #  | 75 Check     |
|                   | C(29)-O(1) -C(31) 1.555 1.555 1.555               | 36.00 Deg.   |
| PLAT882_ALERT_1_G | No Datum for _diffn_reflms_av_unetI/netI .....    | Please Do !  |
| PLAT883_ALERT_1_G | No Info/Value for _atom_sites_solution_primary .  | Please Do !  |
| PLAT963_ALERT_2_G | Both SHELXL WEIGHT Parameters Values Zero .....   | Please Check |

---

0 **ALERT level A** = Most likely a serious problem - resolve or explain  
 1 **ALERT level B** = A potentially serious problem, consider carefully  
 14 **ALERT level C** = Check. Ensure it is not caused by an omission or oversight  
 17 **ALERT level G** = General information/check it is not something unexpected

9 ALERT type 1 CIF construction/syntax error, inconsistent or missing data  
 11 ALERT type 2 Indicator that the structure model may be wrong or deficient  
 2 ALERT type 3 Indicator that the structure quality may be low  
 9 ALERT type 4 Improvement, methodology, query or suggestion  
 1 ALERT type 5 Informative message, check

---

It is advisable to attempt to resolve as many as possible of the alerts in all categories. Often the minor alerts point to easily fixed oversights, errors and omissions in your CIF or refinement strategy, so attention to these fine details can be worthwhile. In order to resolve some of the more serious problems it may be necessary to carry out additional measurements or structure refinements. However, the purpose of your study may justify the reported deviations and the more serious of these should normally be commented upon in the discussion or experimental section of a paper or in the "special\_details" fields of the CIF. checkCIF was carefully designed to identify outliers and unusual parameters, but every test has its limitations and alerts that are not important in a particular case may appear. Conversely, the absence of alerts does not guarantee there are no aspects of the results needing attention. It is up to the individual to critically assess their own results and, if necessary, seek expert advice.

### **Publication of your CIF in IUCr journals**

A basic structural check has been run on your CIF. These basic checks will be run on all CIFs submitted for publication in IUCr journals (*Acta Crystallographica*, *Journal of Applied Crystallography*, *Journal of Synchrotron Radiation*); however, if you intend to submit to *Acta Crystallographica Section C* or *E* or *IUCrData*, you should make sure that full publication checks are run on the final version of your CIF prior to submission.

### **Publication of your CIF in other journals**

Please refer to the *Notes for Authors* of the relevant journal for any special instructions relating to CIF submission.

---

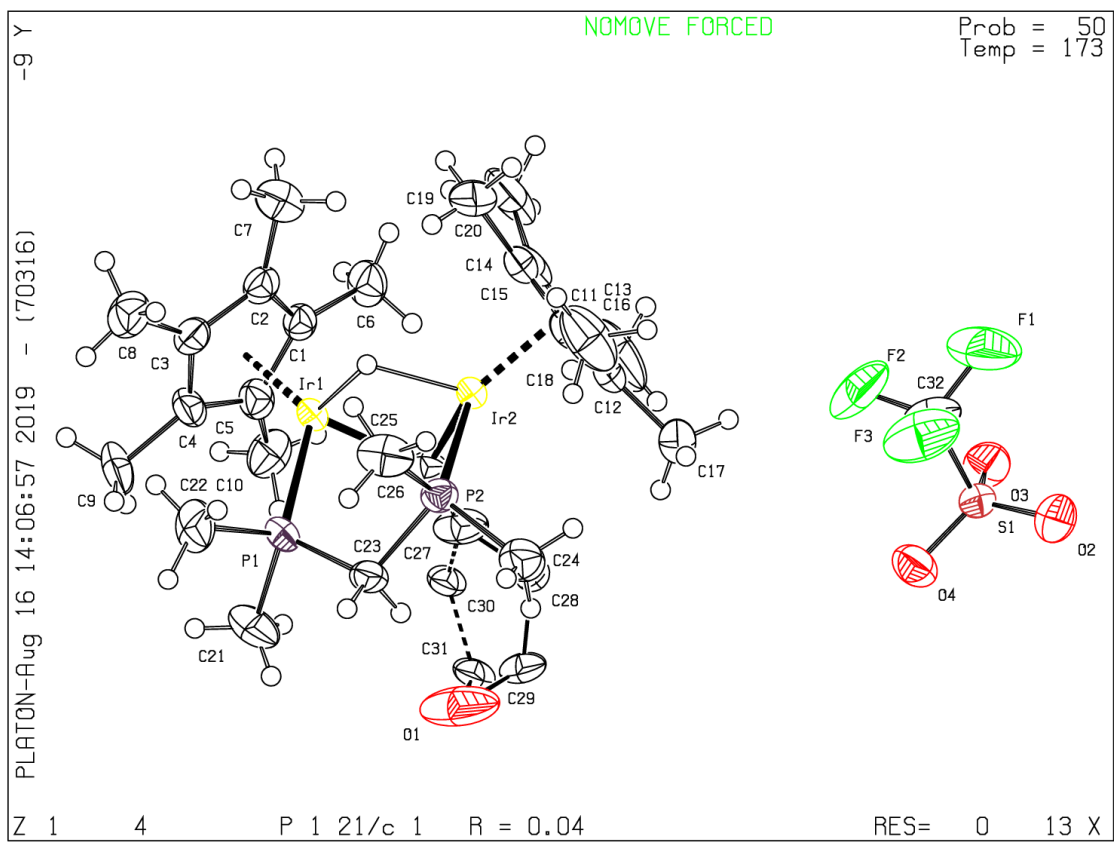

Supplement: s1 [file s1]
