# Supplementary material
Source: MDPI journal article supplement (https://www.mdpi.com/2304-6740/7/10/121)

# checkCIF/PLATON report

You have not supplied any structure factors. As a result the full set of tests cannot be run.

THIS REPORT IS FOR GUIDANCE ONLY. IF USED AS PART OF A REVIEW PROCEDURE FOR PUBLICATION, IT SHOULD NOT REPLACE THE EXPERTISE OF AN EXPERIENCED CRYSTALLOGRAPHIC REFEREE.

No syntax errors found.      CIF dictionary      Interpreting this report

## Datablock: 3

---

|                 |                             |                                |
|-----------------|-----------------------------|--------------------------------|
| Bond precision: | C-C = 0.0163 A              | Wavelength=0.71075             |
| Cell:           | a=9.8123(3)                 | b=18.7073(6)      c=19.0731(5) |
|                 | alpha=90                    | beta=91.8175(8)      gamma=90  |
| Temperature:    | 173 K                       |                                |
|                 | Calculated                  | Reported                       |
| Volume          | 3499.33(18)                 | 3499.34(18)                    |
| Space group     | P 21/c                      | P 1 21/c 1                     |
| Hall group      | -P 2ybc                     | -P 2ybc                        |
| Moiety formula  | C29 H49 Ir2 O P2, C F3 O3 S | C30 H51 F3 Ir2 O4 P2 S         |
| Sum formula     | C30 H49 F3 Ir2 O4 P2 S      | C30 H51 F3 Ir2 O4 P2 S         |
| Mr              | 1009.13                     | 1011.17                        |
| Dx,g cm-3       | 1.916                       | 1.919                          |
| Z               | 4                           | 4                              |
| Mu (mm-1)       | 7.797                       | 7.818                          |
| F000            | 1952.0                      | 1960.0                         |
| F000'           | 1943.13                     |                                |
| h,k,lmax        | 12,24,24                    | 12,24,24                       |
| Nref            | 8008                        | 7925                           |
| Tmin,Tmax       | 0.255,0.458                 | 0.101,0.458                    |
| Tmin'           | 0.092                       |                                |

Correction method= # Reported T Limits: Tmin=0.101 Tmax=0.458  
AbsCorr = MULTI-SCAN

Data completeness= 0.990      Theta(max)= 27.460

R(reflections)= 0.0536( 6039)      wR2(reflections)= wR= 0.0860( 6082)

S = 1.003      Npar= 428

---

The following ALERTS were generated. Each ALERT has the format

**test-name\_ALERT\_alert-type\_alert-level.**

Click on the hyperlinks for more details of the test.

---

**Alert level C**

|                   |                                                  |                |              |
|-------------------|--------------------------------------------------|----------------|--------------|
| PLAT041_ALERT_1_C | Calc. and Reported SumFormula                    | Strings Differ | Please Check |
| PLAT043_ALERT_1_C | Calculated and Reported Mol. Weight Differ by .. | 2.04           | Check        |
| PLAT068_ALERT_1_C | Reported F000 Differs from Calcd (or Missing)... |                | Please Check |
| PLAT094_ALERT_2_C | Ratio of Maximum / Minimum Residual Density .... | 2.21           | Report       |
| PLAT220_ALERT_2_C | Non-Solvent Resd 1 C Ueq(max)/Ueq(min) Range     | 3.2            | Ratio        |
| PLAT234_ALERT_4_C | Large Hirshfeld Difference C15 --C20             | 0.16           | Ang.         |
| PLAT342_ALERT_3_C | Low Bond Precision on C-C Bonds .....            | 0.0163         | Ang.         |

---

**Alert level G**

FORMU01\_ALERT\_2\_G There is a discrepancy between the atom counts in the  
\_chemical\_formula\_sum and the formula from the \_atom\_site\* data.  
Atom count from \_chemical\_formula\_sum: C30 H51 F3 Ir2 O4 P2 S1  
Atom count from the \_atom\_site data: C30 H49 F3 Ir2 O4 P2 S1

CELLZ01\_ALERT\_1\_G Difference between formula and atom\_site contents detected.

CELLZ01\_ALERT\_1\_G WARNING: H atoms missing from atom site list. Is this intentional?  
From the CIF: \_cell\_formula\_units\_Z 4  
From the CIF: \_chemical\_formula\_sum C30 H51 F3 Ir2 O4 P2 S  
TEST: Compare cell contents of formula and atom\_site data

| atom | Z*formula | cif sites | diff |
|------|-----------|-----------|------|
| C    | 120.00    | 120.00    | 0.00 |
| H    | 204.00    | 196.00    | 8.00 |
| F    | 12.00     | 12.00     | 0.00 |
| Ir   | 8.00      | 8.00      | 0.00 |
| O    | 16.00     | 16.00     | 0.00 |
| P    | 8.00      | 8.00      | 0.00 |
| S    | 4.00      | 4.00      | 0.00 |

PLAT005\_ALERT\_5\_G No Embedded Refinement Details Found in the CIF Please Do !

PLAT042\_ALERT\_1\_G Calc. and Reported MoietyFormula Strings Differ Please Check

PLAT066\_ALERT\_1\_G Predicted and Reported Tmin&Tmax Range Identical ? Check

PLAT244\_ALERT\_4\_G Low 'Solvent' Ueq as Compared to Neighbors of C30 Check

PLAT398\_ALERT\_2\_G Deviating C-O-C Angle From 120 for O1 109.3 Degree

PLAT793\_ALERT\_4\_G Model has Chirality at C27 (Centro SPGR) S Verify

PLAT882\_ALERT\_1\_G No Datum for \_diffrn\_reflns\_av\_unetI/netI ..... Please Do !

PLAT883\_ALERT\_1\_G No Info/Value for \_atom\_sites\_solution\_primary . Please Do !

PLAT963\_ALERT\_2\_G Both SHELXL WEIGHT Parameters Values Zero ..... Please Check

PLAT983\_ALERT\_1\_G The Ir-f"= 7.9900 Deviates from IT-Value = 7.9887 Check

---

- 0 **ALERT level A** = Most likely a serious problem - resolve or explain  
0 **ALERT level B** = A potentially serious problem, consider carefully  
7 **ALERT level C** = Check. Ensure it is not caused by an omission or oversight  
13 **ALERT level G** = General information/check it is not something unexpected

- 10 ALERT type 1 CIF construction/syntax error, inconsistent or missing data  
5 ALERT type 2 Indicator that the structure model may be wrong or deficient  
1 ALERT type 3 Indicator that the structure quality may be low  
3 ALERT type 4 Improvement, methodology, query or suggestion  
1 ALERT type 5 Informative message, check
-

It is advisable to attempt to resolve as many as possible of the alerts in all categories. Often the minor alerts point to easily fixed oversights, errors and omissions in your CIF or refinement strategy, so attention to these fine details can be worthwhile. In order to resolve some of the more serious problems it may be necessary to carry out additional measurements or structure refinements. However, the purpose of your study may justify the reported deviations and the more serious of these should normally be commented upon in the discussion or experimental section of a paper or in the "special\_details" fields of the CIF. checkCIF was carefully designed to identify outliers and unusual parameters, but every test has its limitations and alerts that are not important in a particular case may appear. Conversely, the absence of alerts does not guarantee there are no aspects of the results needing attention. It is up to the individual to critically assess their own results and, if necessary, seek expert advice.

### **Publication of your CIF in IUCr journals**

A basic structural check has been run on your CIF. These basic checks will be run on all CIFs submitted for publication in IUCr journals (*Acta Crystallographica*, *Journal of Applied Crystallography*, *Journal of Synchrotron Radiation*); however, if you intend to submit to *Acta Crystallographica Section C* or *E* or *IUCrData*, you should make sure that full publication checks are run on the final version of your CIF prior to submission.

### **Publication of your CIF in other journals**

Please refer to the *Notes for Authors* of the relevant journal for any special instructions relating to CIF submission.

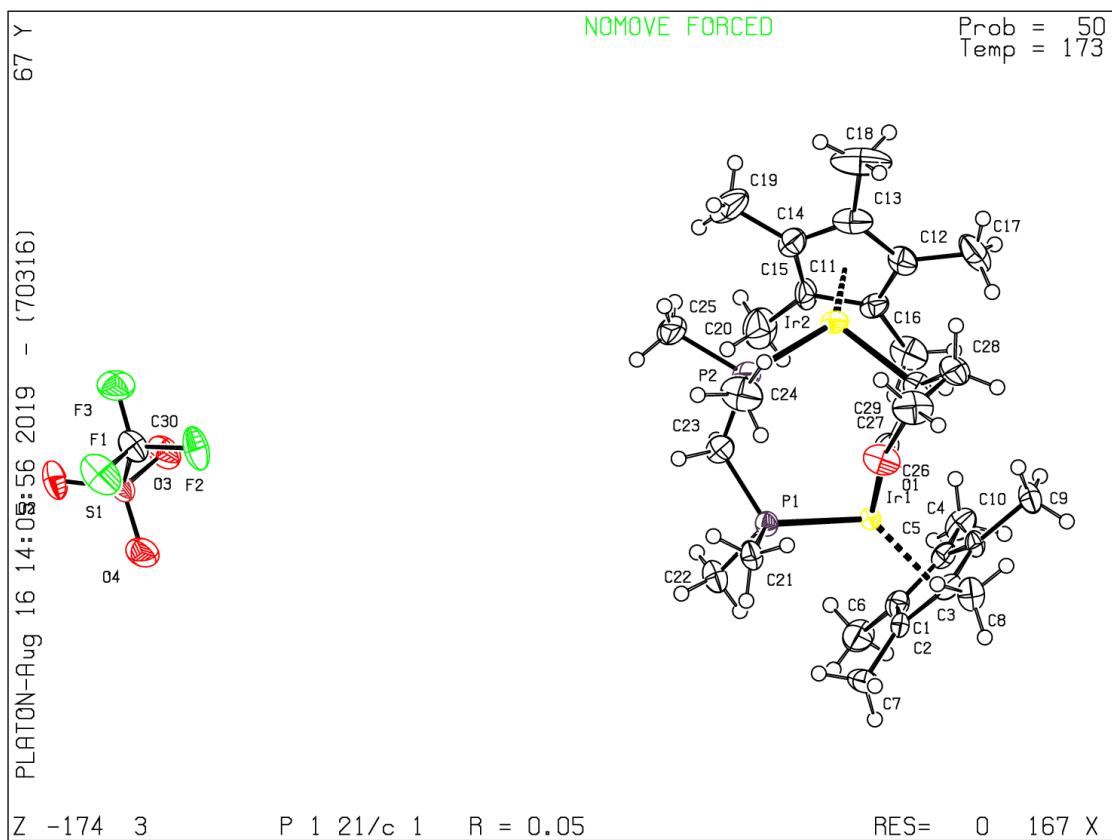

Supplement: s1 [file s1]
