# Supplementary material
Source: MDPI journal article supplement (https://www.mdpi.com/2304-6740/7/10/121)
Supplement: s1 [file s1]

# Supplementary Materials: Successive Activation of C–H and C–O Bonds of Vinyl Ethers by a Diphosphine and Hydrido-Bridged Diiridium Complex

Yoshinori Takahashi, Takuya Shimbayashi and Ken-ichi Fujita

## Crystallography: Experimental Details

The crystal data and experimental details for **3**, **4**, and **5** are summarized in Table 1. Diffraction data for **3**, **4**, and **5** were obtained with a Rigaku RAXIS RAPID instrument. Reflection data for **3**, **4**, and **5** were corrected for Lorentz and polarization effects. Empirical absorption corrections were applied. The structures of **3**, **4**, and **5** were solved by heavy-atom Patterson method<sup>1, 2</sup> and refined anisotropically for non-hydrogen atoms by full-matrix least-squares calculations. Atomic scattering factors and anomalous dispersion terms were taken from the literature.<sup>3</sup> In **4**, two carbon atoms of -vinylidene group exhibited positional disorder. Thus, population parameters of C28, C29, C30, and C31 were refined. This resulted in occupancies of 61% (molecule A with C28 and C29) and 39% (molecule B with C30 and C31). The hydrogen atoms attached to the disordered -vinylidene group in **4** were not located. The location of the metal hydrides in **3** and **4** could not be determined. Other hydrogen atoms were located on the idealized positions. The calculations were performed using the program system CrystalStructure.<sup>4, 5</sup> COD-3000257, 3000258, and 3000259 contain the supplementary crystallographic data for this paper. These data can be obtained free of charge via <http://www.crystallography.net/search.html>.

**Table S1.** Crystal Data and Structure Refinement Parameter for **3**, **4** and **5**.

|                                                            | <b>3</b>                                                                                      | <b>4</b>                                                                                      | <b>5</b>                                                                                      |
|------------------------------------------------------------|-----------------------------------------------------------------------------------------------|-----------------------------------------------------------------------------------------------|-----------------------------------------------------------------------------------------------|
|                                                            | Description of Crystal                                                                        |                                                                                               |                                                                                               |
| color, habit                                               | yellow, block                                                                                 | orange, block                                                                                 | orange, block                                                                                 |
| max cryst dimens (mm)                                      | 0.30 × 0.15 × 0.10                                                                            | 0.35 × 0.15 × 0.15                                                                            | 0.35 × 0.30 × 0.20                                                                            |
| cryst syst                                                 | monoclinic                                                                                    | monoclinic                                                                                    | monoclinic                                                                                    |
| space group                                                | P2 <sub>1</sub> /c (#14)                                                                      | P2 <sub>1</sub> /c (#14)                                                                      | P2 <sub>1</sub> /c (#14)                                                                      |
| <i>a</i> (Å)                                               | 9.8123(3)                                                                                     | 17.2066(5)                                                                                    | 10.63646(19)                                                                                  |
| <i>b</i> (Å)                                               | 18.7073(6)                                                                                    | 13.4578(3)                                                                                    | 19.4945(4)                                                                                    |
| <i>c</i> (Å)                                               | 19.0731(5)                                                                                    | 17.4402(4)                                                                                    | 15.9469(3)                                                                                    |
| $\alpha$ (deg)                                             | 90                                                                                            | 90                                                                                            | 90                                                                                            |
| $\beta$ (deg)                                              | 91.8175(8)                                                                                    | 118.3955(8)                                                                                   | 102.8964(7)                                                                                   |
| $\gamma$ (deg)                                             | 90                                                                                            | 90                                                                                            | 90                                                                                            |
| <i>V</i> (Å <sup>3</sup> )                                 | 3499.34(18)                                                                                   | 3552.61(16)                                                                                   | 3223.22(10)                                                                                   |
| <i>Z</i>                                                   | 4                                                                                             | 4                                                                                             | 4                                                                                             |
| formula                                                    | C <sub>30</sub> H <sub>51</sub> O <sub>4</sub> F <sub>3</sub> P <sub>2</sub> SIr <sub>2</sub> | C <sub>30</sub> H <sub>51</sub> O <sub>4</sub> F <sub>3</sub> P <sub>2</sub> SIr <sub>2</sub> | C <sub>28</sub> H <sub>47</sub> O <sub>3</sub> F <sub>3</sub> P <sub>2</sub> SIr <sub>2</sub> |
| fw                                                         | 1011.17                                                                                       | 1011.17                                                                                       | 967.12                                                                                        |
| <i>D</i> <sub>calc</sub> (g cm <sup>−3</sup> )             | 1.919                                                                                         | 1.890                                                                                         | 1.993                                                                                         |
|                                                            | Data Collection                                                                               |                                                                                               |                                                                                               |
| radiation ( $\lambda$ , Å)                                 | MoK $\alpha$<br>( $\lambda$ = 0.71075 Å)                                                      | MoK $\alpha$<br>( $\lambda$ = 0.71075 Å)                                                      | MoK $\alpha$<br>( $\lambda$ = 0.71075 Å)                                                      |
| temp (K)                                                   | 173                                                                                           | 173                                                                                           | 173                                                                                           |
| no. of data images                                         |                                                                                               | 55                                                                                            |                                                                                               |
| $\omega$ oscillation range ( $\chi$ = 45.0) (deg)          | 130.0–190.0 ( $\phi$ = 30.0)                                                                  | 130.0–190.0 ( $\phi$ = 30.0)                                                                  | 130.0–190.0 ( $\phi$ = 0.0)                                                                   |
| exposure rate (s/deg)                                      | 120.0                                                                                         | 180.0                                                                                         | 240.0                                                                                         |
| $\omega$ oscillation range ( $\chi$ = 45.0) (deg)          | 0.0–160.0 ( $\phi$ = 210.0)                                                                   | 0.0–160.0 ( $\phi$ = 180.0)                                                                   | 0.0–160.0 ( $\phi$ = 180.0)                                                                   |
| exposure rate (s/deg)                                      | 120.0                                                                                         | 180.0                                                                                         | 240.0                                                                                         |
| detector position (mm)                                     | 127.40                                                                                        | 127.40                                                                                        | 127.40                                                                                        |
| pixel size (mm)                                            | 0.100                                                                                         | 0.100                                                                                         | 0.100                                                                                         |
| 2 $\theta$ <sub>max</sub> (deg)                            | 54.92                                                                                         | 54.94                                                                                         | 54.96                                                                                         |
| no. of reflns measd                                        | 33309                                                                                         | 33301                                                                                         | 31455                                                                                         |
|                                                            | Structure Determination                                                                       |                                                                                               |                                                                                               |
| no. of observations                                        | 6039                                                                                          | 6354                                                                                          | 6798                                                                                          |
| no. of variables                                           | 428                                                                                           | 449                                                                                           | 399                                                                                           |
| refln/param ratio                                          | 14.11                                                                                         | 14.15                                                                                         | 17.04                                                                                         |
| transmn factor                                             | 0.101–0.458                                                                                   | 0.131–0.315                                                                                   | 0.060–0.183                                                                                   |
| <i>R</i> ( $I > 2.00\sigma(I)$ ) <sup>a</sup>              | 0.0536                                                                                        | 0.0411                                                                                        | 0.0314                                                                                        |
| <i>R</i> <sub>w</sub> ( $I > 2.00\sigma(I)$ ) <sup>a</sup> | 0.0860 <sup>b</sup>                                                                           | 0.0629 <sup>c</sup>                                                                           | 0.0453 <sup>d</sup>                                                                           |
| goodness of fit indicator                                  | 1.003                                                                                         | 1.003                                                                                         | 1.007                                                                                         |

$$^a R = \frac{\sum ||F_o| - |F_c||}{\sum |F_o|}, R_w = \left[ \frac{\sum w(|F_o| - |F_c|)^2}{\sum wF_o^2} \right]^{1/2} \quad ^b 1/[0.0036F_o^2 + 1.0000 (F_o^2)] \quad ^c 1/[0.0020F_o^2 + 1.0000 (F_o^2)] \quad ^d 1/[0.0002F_o^2 + 1.0000 (F_o^2)].$$

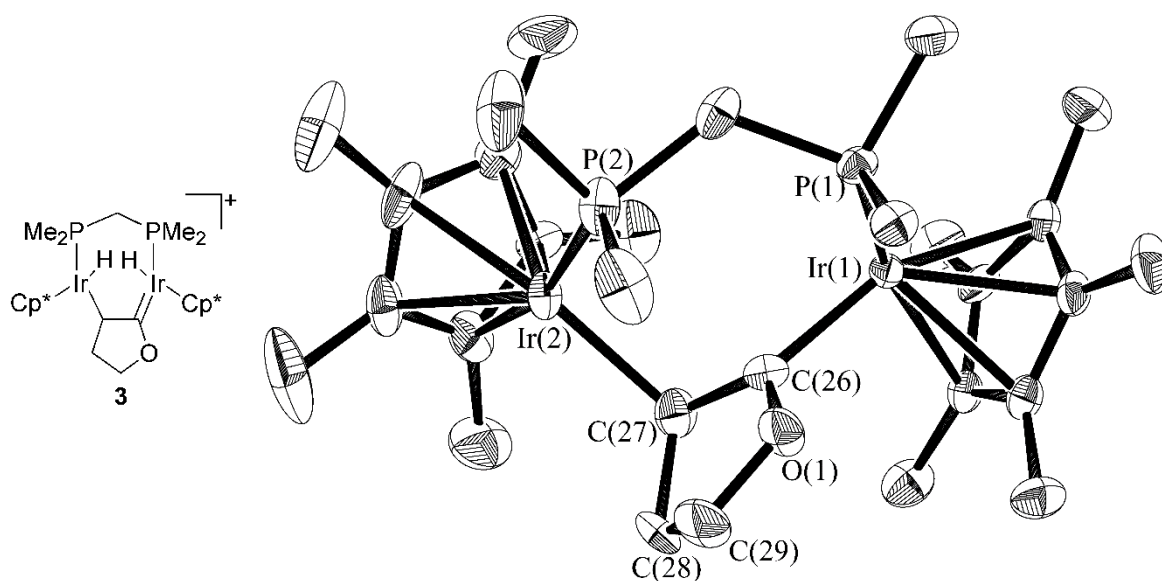

**Figure S1.** ORTEP drawing of cationic part of **3**. Hydrogen atoms are omitted for clarity. Selected bond distances (Å) and angles (deg): Ir(1)–Ir(2) = 4.1838(5), Ir(1)–P(1) = 2.239(2), Ir(2)–P(2) = 2.252(3), Ir(1)–C(26) = 1.978(11), Ir(2)–C(27) = 2.206(11), O(1)–C(26) = 1.394(13), C(26)–C(27) = 1.421(16), C(27)–C(28) = 1.562(16), P(1)–Ir(1)–C(26) = 91.2(3), P(2)–Ir(2)–C(27) = 105.2(3), Ir(1)–C(26)–O(1) = 117.6(8), Ir(1)–C(26)–C(27) = 131.2(8), O(1)–C(26)–C(27) = 109.4(9).

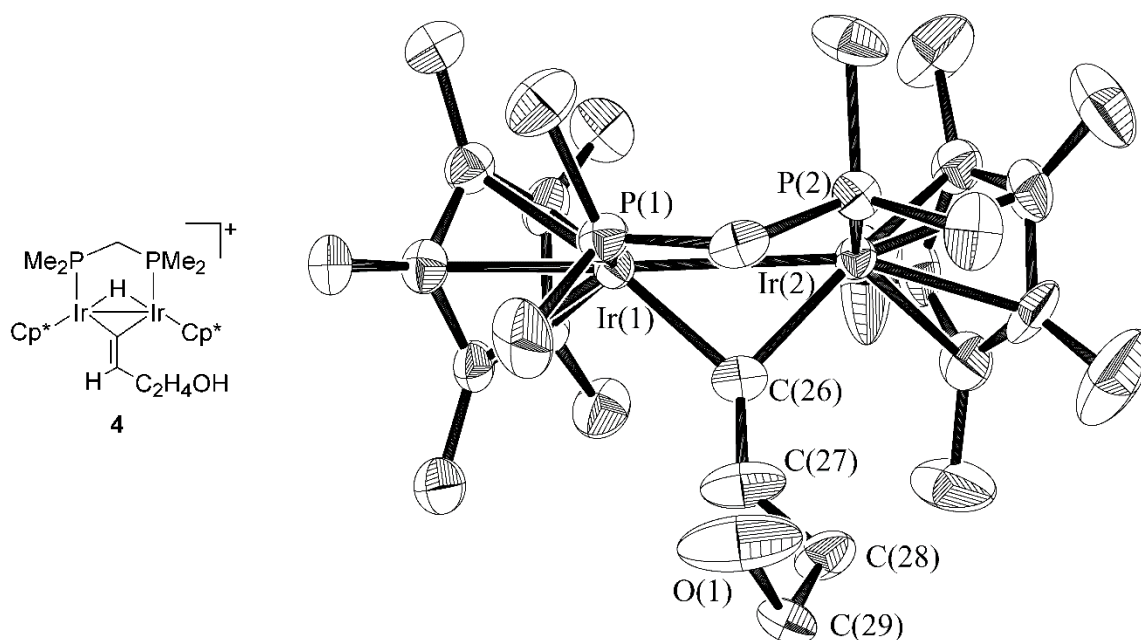

**Figure S2.** ORTEP Drawing of **4**. Hydrogen atoms are omitted for clarity. Two carbon atoms of vinylidene group exhibited positional disorder (molecules A and B). Molecule A (61% occupancy) is shown here. Selected bond distances (Å) and angles (deg): Ir(1)–Ir(2) = 2.8381(3), Ir(1)–P(1) = 2.2512(19), Ir(2)–P(2) = 2.2378(19), Ir(1)–C(26) = 2.022(8), Ir(2)–C(26) = 2.029(5), C(26)–C(27) = 1.337(13), Ir(2)–Ir(1)–P(1) = 93.83(4), Ir(1)–Ir(2)–P(2) = 89.94(4), Ir(2)–Ir(1)–C(26) = 45.62(16), Ir(1)–Ir(2)–C(26) = 45.4(2), Ir(1)–C(26)–Ir(2) = 88.9(3), Ir(1)–C(26)–C(27) = 135.2(5), Ir(2)–C(26)–C(27) = 135.8(6).

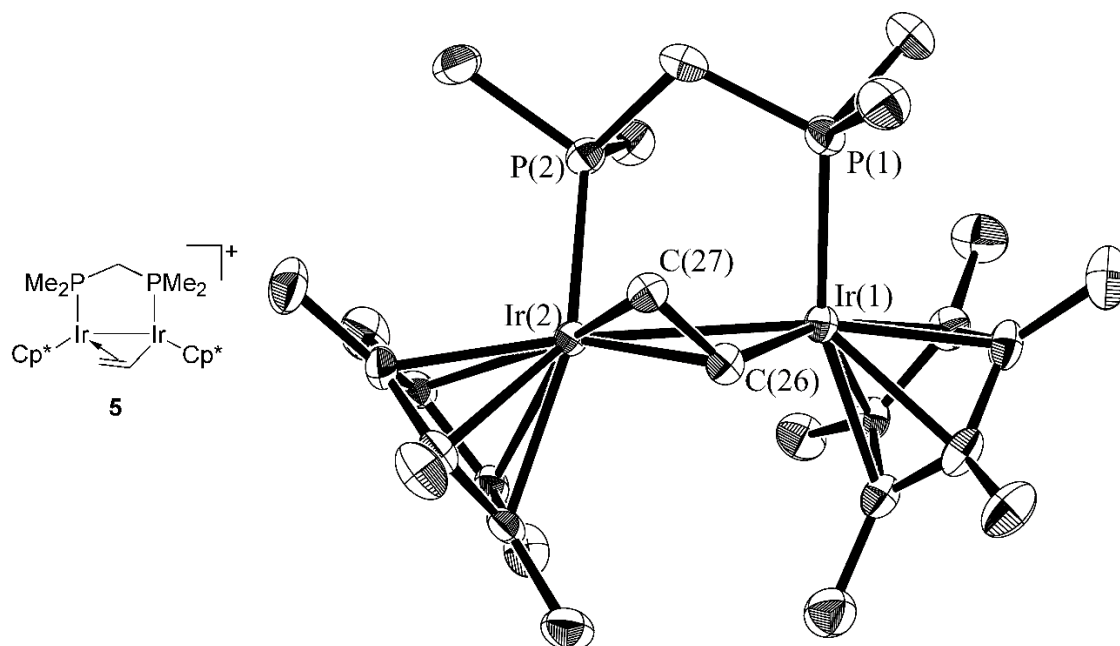

**Figure S3.** ORTEP Drawing of **5**. Hydrogen atoms are omitted for clarity. Selected bond distances (Å) and angles (deg): Ir(1)–Ir(2) = 2.9397(2), Ir(1)–P(1) = 2.2522(12), Ir(2)–P(2) = 2.2567(11), Ir(1)–C(26) = 1.991(3), Ir(2)–C(26) = 2.147(4), Ir(2)–C(27) = 2.146(4), C(26)–C(27) = 1.408(6), Ir(2)–Ir(1)–P(1) = 92.29(3), Ir(1)–Ir(2)–P(2) = 79.77(3), Ir(2)–Ir(1)–C(26) = 46.91(13), Ir(1)–Ir(2)–C(26) = 42.63(10), Ir(1)–C(26)–Ir(2) = 90.46(17).

## References

- 1 P. T. Beurskens, G. Admiraal, G. Beurskens, W. P. Bosman, S. Garcia-Granda, R. O. Gould, J. M. M. Smits, C. Smykalla, *PATY*, Technical Report of the Crystallography Laboratory; University of Nijmegen: Nijmegen, The Netherlands, **1992**.
- 2 P. T. Beurskens, G. Admiraal, G. Beurskens, W. P. Bosman, R. de Gelder, R. Israel, J. M. M. Smits, *The DIRDIF-99 program system*, Technical Report of the Crystallography Laboratory; University of Nijmegen: Nijmegen, The Netherlands, **1999**.
- 3 (a) D. T. Cromer, G. T. Waber, *International Table for X-ray Crystallography*; Kynoch: Birmingham, U.K., **1974**; Vol. IV; (b) J. A. Ibers, W. C. Hamilton, *Acta Crystallogr.* **1964**, *17*, 781. (c) D. C. Creagh, W. J. McAuley in *International Tables for X-ray Crystallography*, ed: A. J. C. Wilson, Kluwer Academic Publishers: Boston, MA, **1992**; Vol. C; (d) D. C. Creagh, J. H. Hubbel in *International Tables for X-ray Crystallography*, ed: A. J. C. Wilson, Kluwer Academic Publishers: Boston, MA, **1992**; Vol. C.
- 4 *CrystalStructure3.8*, Crystal Structure Analysis Package; Rigaku and Rigaku/Molecular Structure Corp., **2000–2006**.
- 5 *CRYSTALS Issue 11*, Carruthers, J. R.; Rollett, J. S.; Betteridge, P. W.; Kinna, D.; Pearce, L.; Larsen, A.; Gabe, E. Chemical Crystallography Laboratory, Oxford, UK, **1999**.
