# Supplementary material
Source: MDPI journal article supplement (https://www.mdpi.com/2304-6740/7/10/121)
Supplement: s1 [file s1]

Archive with 7 entries (7 files):
- checkcif for 3.pdf
- checkcif for 4.pdf
- checkcif for 5.pdf
- inorganics-588859-SI.pdf
- X-ray data of 3.cif
- X-ray data of 4.cif
- X-ray data of 5.cif
