# Supplementary material
Source: MDPI journal article supplement (https://www.mdpi.com/2304-6740/7/10/121)
Supplement: s1 [file s1 › X-ray data of 3.cif]

#==============================================================================

data_3

_publ_author_name    Ken-ichi Fujita

#==============================================================================

# CHEMICAL DATA

_chemical_formula_sum                  'C30 H51 F3 Ir2 O4 P2 S '
_chemical_formula_moiety               'C30 H51 F3 Ir2 O4 P2 S '
_chemical_formula_weight               1011.17
_chemical_melting_point                ?

#==============================================================================

# CRYSTAL DATA
_symmetry_cell_setting                 monoclinic
_symmetry_space_group_name_H-M        'P 1 21/c 1'
_symmetry_space_group_name_Hall       '-P 2ybc'
_symmetry_Int_Tables_number            14
loop_
_symmetry_equiv_pos_site_id
_symmetry_equiv_pos_as_xyz
1   '+X,+Y,+Z'
2   '-X,1/2+Y,1/2-Z'
3   '-X,-Y,-Z'
4   '+X,1/2-Y,1/2+Z'

#------------------------------------------------------------------------------

_cell_length_a                         9.8123(3)
_cell_length_b                         18.7073(6)
_cell_length_c                         19.0731(5)
_cell_angle_alpha                      90.0000
_cell_angle_beta                       91.8175(8)
_cell_angle_gamma                      90.0000
_cell_volume                           3499.34(18)
_cell_formula_units_Z                  4
_cell_measurement_reflns_used          27944
_cell_measurement_theta_min            3.0
_cell_measurement_theta_max            27.5
_cell_measurement_temperature          173.1

#------------------------------------------------------------------------------

_exptl_crystal_description            'block'
_exptl_crystal_colour                 'yellow'
_exptl_crystal_size_max                0.30
_exptl_crystal_size_mid                0.15
_exptl_crystal_size_min                0.10
_exptl_crystal_density_diffrn          1.919
_exptl_crystal_density_meas            ?
_exptl_crystal_density_method         'not measured'
_exptl_crystal_F_000                   1960.00
_exptl_absorpt_coefficient_mu          7.818
_exptl_absorpt_correction_type         multi-scan
_exptl_absorpt_process_details         
;
    Higashi, T. (1995). Program for Absorption Correction.
    Rigaku Corporation, Tokyo, Japan.
;
_exptl_absorpt_correction_T_min        0.101
_exptl_absorpt_correction_T_max        0.458

#==============================================================================

# EXPERIMENTAL DATA

_diffrn_ambient_temperature      173.1
_diffrn_radiation_type                'Mo K\a'
_diffrn_radiation_wavelength           0.71075
_diffrn_measurement_device_type       'Rigaku RAXIS-RAPID'
_diffrn_measurement_method             \w
_diffrn_detector_area_resol_mean       10.00
_diffrn_reflns_number                  33309
_diffrn_reflns_av_R_equivalents        0.066
_diffrn_reflns_theta_max               27.46
_diffrn_measured_fraction_theta_max    0.990
_diffrn_reflns_theta_full              27.46
_diffrn_measured_fraction_theta_full   0.990
_diffrn_reflns_limit_h_min             -10
_diffrn_reflns_limit_h_max             12
_diffrn_reflns_limit_k_min             -24
_diffrn_reflns_limit_k_max             24
_diffrn_reflns_limit_l_min             -24
_diffrn_reflns_limit_l_max             24

#==============================================================================

# REFINEMENT DATA

_refine_special_details
;
    Refinement was performed using reflections with F^2^ > 2.0 sigma(F^2^).
    The weighted R-factor(wR), goodness of fit (S) and R-factor (gt) are 
    based on F, with F set to zero for negative F. The threshold expression of
    F^2^ > 2.0 sigma(F^2^) is used only for calculating R-factor (gt).
;
_reflns_number_total                   7925
_reflns_number_gt                      6039
_reflns_threshold_expression           F^2^>2.0\s(F^2^)
_refine_ls_structure_factor_coef       F
_refine_ls_R_factor_gt                 0.0536
_refine_ls_wR_factor_ref               0.0860
_refine_ls_hydrogen_treatment          refall
_refine_ls_number_reflns               6082
_refine_ls_number_parameters           428
_refine_ls_goodness_of_fit_ref         1.003
_refine_ls_weighting_scheme            calc
_refine_ls_weighting_details
'w = 1/[0.0036Fo^2^ + 1.0000\s(Fo^2^)]'
_refine_ls_shift/su_max                0.0000
_refine_diff_density_max               5.05
_refine_diff_density_min               -2.28
_refine_ls_extinction_method           none
_refine_ls_extinction_coef             ?

loop_
_atom_type_symbol
_atom_type_description
_atom_type_scat_dispersion_real
_atom_type_scat_dispersion_imag
_atom_type_scat_source
  'C' 'C'  0.003 0.002 
;
International Tables for Crystallography
(1992, Vol. C, Tables 4.2.6.8 and 6.1.1.4)
;
  'H' 'H'  0.000 0.000 
;
International Tables for Crystallography
(1992, Vol. C, Table 6.1.1.4)
;
  'P' 'P'  0.102 0.094 
;
International Tables for Crystallography
(1992, Vol. C, Tables 4.2.6.8 and 6.1.1.4)
;
  'Ir' 'Ir'  -1.444 7.990 
;
International Tables for Crystallography
(1992, Vol. C, Tables 4.2.6.8 and 6.1.1.4)
;
  'F' 'F'  0.017 0.010 
;
International Tables for Crystallography
(1992, Vol. C, Tables 4.2.6.8 and 6.1.1.4)
;
  'S' 'S'  0.125 0.123 
;
International Tables for Crystallography
(1992, Vol. C, Tables 4.2.6.8 and 6.1.1.4)
;
  'O' 'O'  0.011 0.006 
;
International Tables for Crystallography
(1992, Vol. C, Tables 4.2.6.8 and 6.1.1.4)
;

#==============================================================================

# ATOMIC COORDINATES AND THERMAL PARAMETERS

loop_
_atom_site_label
_atom_site_type_symbol
_atom_site_fract_x
_atom_site_fract_y
_atom_site_fract_z
_atom_site_U_iso_or_equiv
_atom_site_adp_type
_atom_site_occupancy
_atom_site_symmetry_multiplicity
_atom_site_calc_flag
_atom_site_refinement_flags
_atom_site_disorder_assembly
_atom_site_disorder_group
 Ir(1) Ir 0.21891(4) 0.14653(2) 0.08493(2) 0.02028(11) Uani 1.00 1 d . . .
 Ir(2) Ir 0.32095(4) 0.36361(2) 0.08116(2) 0.02677(13) Uani 1.00 1 d . . .
 S(1) S 0.7898(2) 0.27012(17) 0.84456(14) 0.0312(7) Uani 1.00 1 d . . .
 P(1) P 0.3666(2) 0.14991(16) 0.17680(14) 0.0253(7) Uani 1.00 1 d . . .
 P(2) P 0.4607(3) 0.31198(18) 0.16227(17) 0.0340(8) Uani 1.00 1 d . . .
 F(1) F 1.0478(7) 0.2754(5) 0.8138(4) 0.057(2) Uani 1.00 1 d . . .
 F(2) F 0.9112(8) 0.2959(5) 0.7266(3) 0.057(2) Uani 1.00 1 d . . .
 F(3) F 0.9476(8) 0.3761(4) 0.8061(4) 0.053(2) Uani 1.00 1 d . . .
 O(1) O 0.4569(7) 0.1975(5) 0.0136(4) 0.038(2) Uani 1.00 1 d . . .
 O(2) O 0.8269(8) 0.2876(5) 0.9157(3) 0.045(2) Uani 1.00 1 d . . .
 O(3) O 0.6747(8) 0.3086(5) 0.8155(4) 0.047(2) Uani 1.00 1 d . . .
 O(4) O 0.7925(9) 0.1958(5) 0.8284(4) 0.053(3) Uani 1.00 1 d . . .
 C(1) C 0.0686(10) 0.0558(6) 0.0956(5) 0.028(2) Uani 1.00 1 d . . .
 C(2) C 0.1932(12) 0.0259(6) 0.0685(5) 0.031(3) Uani 1.00 1 d . . .
 C(3) C 0.2156(11) 0.0593(6) 0.0025(5) 0.029(2) Uani 1.00 1 d . . .
 C(4) C 0.1027(10) 0.1081(6) -0.0111(4) 0.023(2) Uani 1.00 1 d . . .
 C(5) C 0.0151(10) 0.1049(6) 0.0462(5) 0.028(2) Uani 1.00 1 d . . .
 C(6) C 0.0006(14) 0.0307(8) 0.1601(6) 0.048(4) Uani 1.00 1 d . . .
 C(7) C 0.2749(13) -0.0341(7) 0.1007(7) 0.044(3) Uani 1.00 1 d . . .
 C(8) C 0.3230(11) 0.0422(7) -0.0471(5) 0.037(3) Uani 1.00 1 d . . .
 C(9) C 0.0795(13) 0.1512(7) -0.0769(5) 0.036(3) Uani 1.00 1 d . . .
 C(10) C -0.1191(11) 0.1433(7) 0.0507(6) 0.039(3) Uani 1.00 1 d . . .
 C(11) C 0.0915(10) 0.3869(6) 0.0812(6) 0.031(3) Uani 1.00 1 d . . .
 C(12) C 0.1557(11) 0.4287(7) 0.0284(6) 0.034(3) Uani 1.00 1 d . . .
 C(13) C 0.2521(12) 0.4755(7) 0.0621(7) 0.042(3) Uani 1.00 1 d . . .
 C(14) C 0.2510(12) 0.4616(7) 0.1365(6) 0.039(3) Uani 1.00 1 d . . .
 C(15) C 0.1507(12) 0.4076(7) 0.1480(5) 0.035(3) Uani 1.00 1 d . . .
 C(16) C -0.0216(12) 0.3350(8) 0.0701(7) 0.047(4) Uani 1.00 1 d . . .
 C(17) C 0.1125(16) 0.4278(9) -0.0487(6) 0.058(4) Uani 1.00 1 d . . .
 C(18) C 0.3267(15) 0.5357(8) 0.0289(10) 0.077(5) Uani 1.00 1 d . . .
 C(19) C 0.3163(16) 0.5085(8) 0.1926(9) 0.072(5) Uani 1.00 1 d . . .
 C(20) C 0.1032(17) 0.3796(9) 0.2169(7) 0.062(5) Uani 1.00 1 d . . .
 C(21) C 0.5316(11) 0.1093(7) 0.1634(5) 0.032(3) Uani 1.00 1 d . . .
 C(22) C 0.3127(12) 0.1027(7) 0.2560(5) 0.036(3) Uani 1.00 1 d . . .
 C(23) C 0.4044(10) 0.2376(6) 0.2148(6) 0.032(3) Uani 1.00 1 d . . .
 C(24) C 0.6305(12) 0.2833(8) 0.1342(7) 0.054(4) Uani 1.00 1 d . . .
 C(25) C 0.5166(17) 0.3703(8) 0.2334(8) 0.062(4) Uani 1.00 1 d . . .
 C(26) C 0.3273(11) 0.2177(6) 0.0340(5) 0.030(3) Uani 1.00 1 d . . .
 C(27) C 0.2883(11) 0.2819(6) -0.0010(5) 0.030(3) Uani 1.00 1 d . . .
 C(28) C 0.3782(14) 0.2881(8) -0.0669(6) 0.047(3) Uani 1.00 1 d . . .
 C(29) C 0.5038(14) 0.2474(8) -0.0396(7) 0.051(4) Uani 1.00 1 d . . .
 C(30) C 0.9330(11) 0.3071(7) 0.7963(5) 0.036(3) Uani 1.00 1 d . . .
 H(1) H 0.0558 -0.0053 0.1819 0.057 Uiso 1.00 1 c R . .
 H(2) H -0.0866 0.0114 0.1481 0.057 Uiso 1.00 1 c R . .
 H(3) H -0.0094 0.0695 0.1916 0.057 Uiso 1.00 1 c R . .
 H(4) H 0.3499 -0.0450 0.0723 0.052 Uiso 1.00 1 c R . .
 H(5) H 0.2185 -0.0751 0.1045 0.052 Uiso 1.00 1 c R . .
 H(6) H 0.3076 -0.0202 0.1461 0.052 Uiso 1.00 1 c R . .
 H(7) H 0.3076 0.0687 -0.0890 0.044 Uiso 1.00 1 c R . .
 H(8) H 0.3205 -0.0075 -0.0575 0.044 Uiso 1.00 1 c R . .
 H(9) H 0.4098 0.0542 -0.0270 0.044 Uiso 1.00 1 c R . .
 H(10) H -0.0025 0.1778 -0.0738 0.043 Uiso 1.00 1 c R . .
 H(11) H 0.0727 0.1198 -0.1160 0.043 Uiso 1.00 1 c R . .
 H(12) H 0.1538 0.1830 -0.0825 0.043 Uiso 1.00 1 c R . .
 H(13) H -0.1604 0.1321 0.0937 0.046 Uiso 1.00 1 c R . .
 H(14) H -0.1776 0.1288 0.0127 0.046 Uiso 1.00 1 c R . .
 H(15) H -0.1038 0.1933 0.0482 0.046 Uiso 1.00 1 c R . .
 H(16) H -0.0457 0.3320 0.0216 0.056 Uiso 1.00 1 c R . .
 H(17) H -0.0981 0.3508 0.0952 0.056 Uiso 1.00 1 c R . .
 H(18) H 0.0061 0.2893 0.0868 0.056 Uiso 1.00 1 c R . .
 H(19) H 0.1638 0.4620 -0.0735 0.070 Uiso 1.00 1 c R . .
 H(20) H 0.0183 0.4392 -0.0532 0.070 Uiso 1.00 1 c R . .
 H(21) H 0.1276 0.3816 -0.0676 0.070 Uiso 1.00 1 c R . .
 H(22) H 0.3765 0.5614 0.0643 0.093 Uiso 1.00 1 c R . .
 H(23) H 0.2632 0.5668 0.0059 0.093 Uiso 1.00 1 c R . .
 H(24) H 0.3880 0.5174 -0.0042 0.093 Uiso 1.00 1 c R . .
 H(25) H 0.2896 0.4910 0.2369 0.086 Uiso 1.00 1 c R . .
 H(26) H 0.2861 0.5565 0.1869 0.086 Uiso 1.00 1 c R . .
 H(27) H 0.4128 0.5069 0.1903 0.086 Uiso 1.00 1 c R . .
 H(28) H 0.0329 0.3454 0.2089 0.074 Uiso 1.00 1 c R . .
 H(29) H 0.0689 0.4184 0.2434 0.074 Uiso 1.00 1 c R . .
 H(30) H 0.1772 0.3580 0.2422 0.074 Uiso 1.00 1 c R . .
 H(31) H 0.5287 0.0602 0.1759 0.038 Uiso 1.00 1 c R . .
 H(32) H 0.5988 0.1329 0.1919 0.038 Uiso 1.00 1 c R . .
 H(33) H 0.5538 0.1136 0.1155 0.038 Uiso 1.00 1 c R . .
 H(34) H 0.2641 0.1347 0.2848 0.044 Uiso 1.00 1 c R . .
 H(35) H 0.3908 0.0854 0.2813 0.044 Uiso 1.00 1 c R . .
 H(36) H 0.2554 0.0637 0.2429 0.044 Uiso 1.00 1 c R . .
 H(37) H 0.3227 0.2530 0.2356 0.038 Uiso 1.00 1 c R . .
 H(38) H 0.4729 0.2302 0.2504 0.038 Uiso 1.00 1 c R . .
 H(39) H 0.6252 0.2354 0.1178 0.065 Uiso 1.00 1 c R . .
 H(40) H 0.6942 0.2861 0.1727 0.065 Uiso 1.00 1 c R . .
 H(41) H 0.6593 0.3136 0.0975 0.065 Uiso 1.00 1 c R . .
 H(42) H 0.5983 0.3941 0.2216 0.073 Uiso 1.00 1 c R . .
 H(43) H 0.5324 0.3430 0.2749 0.073 Uiso 1.00 1 c R . .
 H(44) H 0.4473 0.4046 0.2411 0.073 Uiso 1.00 1 c R . .
 H(45) H 0.1946 0.2797 -0.0149 0.036 Uiso 1.00 1 c R . .
 H(46) H 0.3373 0.2651 -0.1066 0.056 Uiso 1.00 1 c R . .
 H(47) H 0.3974 0.3365 -0.0782 0.056 Uiso 1.00 1 c R . .
 H(48) H 0.5675 0.2800 -0.0189 0.062 Uiso 1.00 1 c R . .
 H(49) H 0.5454 0.2222 -0.0765 0.062 Uiso 1.00 1 c R . .


loop_
_atom_site_aniso_label
_atom_site_aniso_U_11
_atom_site_aniso_U_22
_atom_site_aniso_U_33
_atom_site_aniso_U_12
_atom_site_aniso_U_13
_atom_site_aniso_U_23
 Ir(1) 0.0200(2) 0.0215(2) 0.0193(2) 0.00027(15) 0.00045(15) 0.00070(14)
 Ir(2) 0.0196(2) 0.0222(2) 0.0383(2) -0.00090(16) -0.00179(18) 0.00103(17)
 S(1) 0.0236(14) 0.0378(18) 0.0318(14) -0.0045(11) -0.0069(10) 0.0093(11)
 P(1) 0.0248(14) 0.0270(16) 0.0239(13) 0.0040(11) -0.0008(10) -0.0014(10)
 P(2) 0.0218(14) 0.0309(17) 0.0486(17) -0.0027(12) -0.0103(12) -0.0000(13)
 F(1) 0.027(3) 0.080(6) 0.066(4) 0.007(3) 0.011(3) 0.024(4)
 F(2) 0.064(5) 0.088(7) 0.020(3) 0.006(4) 0.004(3) 0.007(3)
 F(3) 0.053(5) 0.043(5) 0.064(4) -0.015(4) 0.004(3) 0.011(3)
 O(1) 0.020(4) 0.043(5) 0.052(4) 0.003(3) 0.018(3) 0.009(4)
 O(2) 0.042(4) 0.071(7) 0.023(3) -0.003(4) 0.000(3) 0.010(4)
 O(3) 0.032(4) 0.052(6) 0.057(5) 0.006(4) -0.010(3) 0.014(4)
 O(4) 0.049(5) 0.041(6) 0.068(6) -0.006(4) -0.023(4) 0.015(4)
 C(1) 0.023(5) 0.033(6) 0.029(5) -0.007(4) -0.001(4) -0.003(4)
 C(2) 0.042(6) 0.026(6) 0.023(5) -0.001(5) -0.014(4) -0.003(4)
 C(3) 0.030(6) 0.028(6) 0.030(5) -0.004(4) 0.004(4) -0.009(4)
 C(4) 0.028(5) 0.031(6) 0.012(4) 0.002(4) 0.004(3) -0.001(3)
 C(5) 0.023(5) 0.029(6) 0.032(5) -0.002(4) -0.002(4) -0.008(4)
 C(6) 0.057(8) 0.049(9) 0.037(6) -0.021(7) 0.010(5) 0.001(5)
 C(7) 0.043(7) 0.029(7) 0.058(7) -0.005(5) -0.011(6) 0.015(5)
 C(8) 0.029(6) 0.050(8) 0.031(5) 0.009(5) 0.003(4) -0.004(5)
 C(9) 0.037(7) 0.045(7) 0.026(5) 0.001(5) -0.007(4) 0.006(5)
 C(10) 0.021(6) 0.044(8) 0.051(7) -0.005(5) -0.000(5) -0.010(5)
 C(11) 0.020(5) 0.026(6) 0.045(6) -0.002(4) -0.004(4) -0.003(5)
 C(12) 0.021(5) 0.038(7) 0.044(6) 0.008(4) -0.004(4) 0.005(5)
 C(13) 0.022(6) 0.030(7) 0.076(9) 0.003(5) 0.008(5) 0.007(6)
 C(14) 0.031(6) 0.034(7) 0.049(6) 0.008(5) -0.014(5) -0.008(5)
 C(15) 0.043(7) 0.042(7) 0.019(5) 0.012(5) -0.001(4) -0.007(4)
 C(16) 0.017(5) 0.054(9) 0.069(9) -0.000(5) 0.002(5) 0.014(7)
 C(17) 0.073(10) 0.065(11) 0.037(6) 0.030(8) -0.003(6) 0.016(6)
 C(18) 0.039(8) 0.037(9) 0.157(17) 0.002(6) 0.044(10) 0.021(10)
 C(19) 0.057(9) 0.043(9) 0.114(13) 0.009(7) -0.045(9) -0.027(9)
 C(20) 0.068(10) 0.072(12) 0.045(7) 0.012(9) 0.007(7) -0.013(7)
 C(21) 0.031(6) 0.039(7) 0.025(5) 0.005(5) -0.005(4) 0.002(4)
 C(22) 0.031(6) 0.049(8) 0.029(5) 0.000(5) -0.003(4) 0.007(5)
 C(23) 0.022(5) 0.032(6) 0.043(6) 0.006(4) -0.004(4) -0.006(4)
 C(24) 0.023(6) 0.055(10) 0.084(10) 0.006(6) 0.005(6) 0.013(7)
 C(25) 0.075(11) 0.034(8) 0.073(10) -0.002(7) -0.046(8) -0.005(7)
 C(26) 0.031(6) 0.031(6) 0.028(5) 0.003(4) 0.001(4) -0.007(4)
 C(27) 0.027(5) 0.034(6) 0.029(5) -0.003(4) 0.007(4) 0.001(4)
 C(28) 0.070(9) 0.042(8) 0.028(5) -0.007(7) 0.010(5) 0.010(5)
 C(29) 0.047(8) 0.051(9) 0.057(8) -0.002(7) 0.030(6) 0.003(6)
 C(30) 0.028(6) 0.048(8) 0.033(6) 0.002(5) 0.008(4) 0.011(5)

#==============================================================================

_computing_data_collection            'PROCESS-AUTO'
_computing_cell_refinement            'PROCESS-AUTO'
_computing_data_reduction             'CrystalStructure'
_computing_structure_solution         'DIRDIF99 (PATTY)'
_computing_structure_refinement       'CRYSTALS'
_computing_publication_material       'CrystalStructure 3.8'
_computing_molecular_graphics          ?

#==============================================================================

# MOLECULAR GEOMETRY

_geom_special_details
;
    ENTER SPECIAL DETAILS OF THE MOLECULAR GEOMETRY
;

loop_
_geom_bond_atom_site_label_1
_geom_bond_atom_site_label_2
_geom_bond_distance
_geom_bond_publ_flag
_geom_bond_site_symmetry_1
_geom_bond_site_symmetry_2
Ir(1) P(1) 2.239(2) yes . .
Ir(1) C(1) 2.263(11) yes . .
Ir(1) C(2) 2.291(11) yes . .
Ir(1) C(3) 2.266(11) yes . .
Ir(1) C(4) 2.245(9) yes . .
Ir(1) C(5) 2.248(10) yes . .
Ir(1) C(26) 1.978(11) yes . .
Ir(2) P(2) 2.252(3) yes . .
Ir(2) C(11) 2.293(10) yes . .
Ir(2) C(12) 2.241(11) yes . .
Ir(2) C(13) 2.227(13) yes . .
Ir(2) C(14) 2.235(13) yes . .
Ir(2) C(15) 2.286(12) yes . .
Ir(2) C(27) 2.206(11) yes . .
S(1) O(2) 1.431(7) yes . .
S(1) O(3) 1.436(9) yes . .
S(1) O(4) 1.424(11) yes . .
S(1) C(30) 1.839(12) yes . .
P(1) C(21) 1.814(11) yes . .
P(1) C(22) 1.842(11) yes . .
P(1) C(23) 1.827(12) yes . .
P(2) C(23) 1.811(12) yes . .
P(2) C(24) 1.846(13) yes . .
P(2) C(25) 1.813(16) yes . .
F(1) C(30) 1.307(14) yes . .
F(2) C(30) 1.356(12) yes . .
F(3) C(30) 1.311(16) yes . .
O(1) C(26) 1.394(13) yes . .
O(1) C(29) 1.465(17) yes . .
C(1) C(2) 1.454(16) yes . .
C(1) C(5) 1.406(15) yes . .
C(1) C(6) 1.494(16) yes . .
C(2) C(3) 1.427(15) yes . .
C(2) C(7) 1.500(17) yes . .
C(3) C(4) 1.452(15) yes . .
C(3) C(8) 1.474(15) yes . .
C(4) C(5) 1.413(14) yes . .
C(4) C(9) 1.503(15) yes . .
C(5) C(10) 1.504(16) yes . .
C(11) C(12) 1.436(16) yes . .
C(11) C(15) 1.437(15) yes . .
C(11) C(16) 1.484(17) yes . .
C(12) C(13) 1.427(17) yes . .
C(12) C(17) 1.518(17) yes . .
C(13) C(14) 1.444(19) yes . .
C(13) C(18) 1.49(2) yes . .
C(14) C(15) 1.432(18) yes . .
C(14) C(19) 1.51(2) yes . .
C(15) C(20) 1.504(18) yes . .
C(26) C(27) 1.421(16) yes . .
C(27) C(28) 1.562(16) yes . .
C(28) C(29) 1.53(2) yes . .
C(6) H(1) 0.950 no . .
C(6) H(2) 0.950 no . .
C(6) H(3) 0.950 no . .
C(7) H(4) 0.950 no . .
C(7) H(5) 0.950 no . .
C(7) H(6) 0.950 no . .
C(8) H(7) 0.950 no . .
C(8) H(8) 0.950 no . .
C(8) H(9) 0.950 no . .
C(9) H(10) 0.950 no . .
C(9) H(11) 0.950 no . .
C(9) H(12) 0.950 no . .
C(10) H(13) 0.950 no . .
C(10) H(14) 0.950 no . .
C(10) H(15) 0.950 no . .
C(16) H(16) 0.950 no . .
C(16) H(17) 0.950 no . .
C(16) H(18) 0.950 no . .
C(17) H(19) 0.950 no . .
C(17) H(20) 0.950 no . .
C(17) H(21) 0.950 no . .
C(18) H(22) 0.950 no . .
C(18) H(23) 0.950 no . .
C(18) H(24) 0.950 no . .
C(19) H(25) 0.950 no . .
C(19) H(26) 0.950 no . .
C(19) H(27) 0.950 no . .
C(20) H(28) 0.950 no . .
C(20) H(29) 0.950 no . .
C(20) H(30) 0.950 no . .
C(21) H(31) 0.950 no . .
C(21) H(32) 0.950 no . .
C(21) H(33) 0.950 no . .
C(22) H(34) 0.950 no . .
C(22) H(35) 0.950 no . .
C(22) H(36) 0.950 no . .
C(23) H(37) 0.950 no . .
C(23) H(38) 0.950 no . .
C(24) H(39) 0.950 no . .
C(24) H(40) 0.950 no . .
C(24) H(41) 0.950 no . .
C(25) H(42) 0.950 no . .
C(25) H(43) 0.950 no . .
C(25) H(44) 0.950 no . .
C(27) H(45) 0.950 no . .
C(28) H(46) 0.950 no . .
C(28) H(47) 0.950 no . .
C(29) H(48) 0.950 no . .
C(29) H(49) 0.950 no . .

loop_
_geom_angle_atom_site_label_1
_geom_angle_atom_site_label_2
_geom_angle_atom_site_label_3
_geom_angle
_geom_angle_publ_flag
_geom_angle_site_symmetry_1
_geom_angle_site_symmetry_2
_geom_angle_site_symmetry_3
P(1) Ir(1) C(1) 111.0(2) yes . . .
P(1) Ir(1) C(2) 101.6(2) yes . . .
P(1) Ir(1) C(3) 123.9(2) yes . . .
P(1) Ir(1) C(4) 161.2(2) yes . . .
P(1) Ir(1) C(5) 144.4(2) yes . . .
P(1) Ir(1) C(26) 91.2(3) yes . . .
C(1) Ir(1) C(2) 37.2(4) yes . . .
C(1) Ir(1) C(3) 61.7(3) yes . . .
C(1) Ir(1) C(4) 61.1(3) yes . . .
C(1) Ir(1) C(5) 36.3(3) yes . . .
C(1) Ir(1) C(26) 155.7(3) yes . . .
C(2) Ir(1) C(3) 36.5(3) yes . . .
C(2) Ir(1) C(4) 61.4(3) yes . . .
C(2) Ir(1) C(5) 61.4(4) yes . . .
C(2) Ir(1) C(26) 130.9(4) yes . . .
C(3) Ir(1) C(4) 37.6(3) yes . . .
C(3) Ir(1) C(5) 62.0(4) yes . . .
C(3) Ir(1) C(26) 98.1(4) yes . . .
C(4) Ir(1) C(5) 36.7(3) yes . . .
C(4) Ir(1) C(26) 94.7(4) yes . . .
C(5) Ir(1) C(26) 124.0(4) yes . . .
P(2) Ir(2) C(11) 131.1(3) yes . . .
P(2) Ir(2) C(12) 163.3(3) yes . . .
P(2) Ir(2) C(13) 133.7(3) yes . . .
P(2) Ir(2) C(14) 102.5(3) yes . . .
P(2) Ir(2) C(15) 102.2(2) yes . . .
P(2) Ir(2) C(27) 105.2(3) yes . . .
C(11) Ir(2) C(12) 36.9(4) yes . . .
C(11) Ir(2) C(13) 61.9(4) yes . . .
C(11) Ir(2) C(14) 61.8(4) yes . . .
C(11) Ir(2) C(15) 36.6(4) yes . . .
C(11) Ir(2) C(27) 90.6(4) yes . . .
C(12) Ir(2) C(13) 37.2(4) yes . . .
C(12) Ir(2) C(14) 62.4(4) yes . . .
C(12) Ir(2) C(15) 61.6(4) yes . . .
C(12) Ir(2) C(27) 88.3(4) yes . . .
C(13) Ir(2) C(14) 37.8(5) yes . . .
C(13) Ir(2) C(15) 61.9(4) yes . . .
C(13) Ir(2) C(27) 120.0(4) yes . . .
C(14) Ir(2) C(15) 36.9(4) yes . . .
C(14) Ir(2) C(27) 149.8(4) yes . . .
C(15) Ir(2) C(27) 123.6(4) yes . . .
O(2) S(1) O(3) 115.1(5) yes . . .
O(2) S(1) O(4) 115.0(6) yes . . .
O(2) S(1) C(30) 102.3(5) yes . . .
O(3) S(1) O(4) 115.2(5) yes . . .
O(3) S(1) C(30) 102.8(5) yes . . .
O(4) S(1) C(30) 103.8(5) yes . . .
Ir(1) P(1) C(21) 115.9(3) yes . . .
Ir(1) P(1) C(22) 115.7(3) yes . . .
Ir(1) P(1) C(23) 117.0(3) yes . . .
C(21) P(1) C(22) 101.3(5) yes . . .
C(21) P(1) C(23) 105.1(5) yes . . .
C(22) P(1) C(23) 99.5(5) yes . . .
Ir(2) P(2) C(23) 121.3(3) yes . . .
Ir(2) P(2) C(24) 117.4(4) yes . . .
Ir(2) P(2) C(25) 114.8(5) yes . . .
C(23) P(2) C(24) 103.4(6) yes . . .
C(23) P(2) C(25) 98.0(6) yes . . .
C(24) P(2) C(25) 97.9(7) yes . . .
C(26) O(1) C(29) 109.2(9) yes . . .
Ir(1) C(1) C(2) 72.4(6) yes . . .
Ir(1) C(1) C(5) 71.3(6) yes . . .
Ir(1) C(1) C(6) 128.2(8) yes . . .
C(2) C(1) C(5) 108.3(9) yes . . .
C(2) C(1) C(6) 125.1(10) yes . . .
C(5) C(1) C(6) 126.2(10) yes . . .
Ir(1) C(2) C(1) 70.4(6) yes . . .
Ir(1) C(2) C(3) 70.8(6) yes . . .
Ir(1) C(2) C(7) 128.7(8) yes . . .
C(1) C(2) C(3) 107.5(9) yes . . .
C(1) C(2) C(7) 125.9(10) yes . . .
C(3) C(2) C(7) 126.4(10) yes . . .
Ir(1) C(3) C(2) 72.7(6) yes . . .
Ir(1) C(3) C(4) 70.4(5) yes . . .
Ir(1) C(3) C(8) 127.4(8) yes . . .
C(2) C(3) C(4) 107.1(9) yes . . .
C(2) C(3) C(8) 127.2(10) yes . . .
C(4) C(3) C(8) 125.3(9) yes . . .
Ir(1) C(4) C(3) 72.0(5) yes . . .
Ir(1) C(4) C(5) 71.8(5) yes . . .
Ir(1) C(4) C(9) 124.7(7) yes . . .
C(3) C(4) C(5) 108.4(8) yes . . .
C(3) C(4) C(9) 125.5(9) yes . . .
C(5) C(4) C(9) 126.0(10) yes . . .
Ir(1) C(5) C(1) 72.4(6) yes . . .
Ir(1) C(5) C(4) 71.5(5) yes . . .
Ir(1) C(5) C(10) 126.0(8) yes . . .
C(1) C(5) C(4) 108.8(9) yes . . .
C(1) C(5) C(10) 125.7(10) yes . . .
C(4) C(5) C(10) 125.4(10) yes . . .
Ir(2) C(11) C(12) 69.6(6) yes . . .
Ir(2) C(11) C(15) 71.4(6) yes . . .
Ir(2) C(11) C(16) 127.3(8) yes . . .
C(12) C(11) C(15) 107.5(9) yes . . .
C(12) C(11) C(16) 126.8(10) yes . . .
C(15) C(11) C(16) 125.6(11) yes . . .
Ir(2) C(12) C(11) 73.5(6) yes . . .
Ir(2) C(12) C(13) 70.8(6) yes . . .
Ir(2) C(12) C(17) 127.2(9) yes . . .
C(11) C(12) C(13) 108.5(10) yes . . .
C(11) C(12) C(17) 123.9(11) yes . . .
C(13) C(12) C(17) 127.2(12) yes . . .
Ir(2) C(13) C(12) 71.9(7) yes . . .
Ir(2) C(13) C(14) 71.4(7) yes . . .
Ir(2) C(13) C(18) 128.8(9) yes . . .
C(12) C(13) C(14) 107.9(11) yes . . .
C(12) C(13) C(18) 126.8(13) yes . . .
C(14) C(13) C(18) 124.8(13) yes . . .
Ir(2) C(14) C(13) 70.8(7) yes . . .
Ir(2) C(14) C(15) 73.5(7) yes . . .
Ir(2) C(14) C(19) 133.0(9) yes . . .
C(13) C(14) C(15) 107.7(10) yes . . .
C(13) C(14) C(19) 125.1(12) yes . . .
C(15) C(14) C(19) 125.5(11) yes . . .
Ir(2) C(15) C(11) 72.0(6) yes . . .
Ir(2) C(15) C(14) 69.6(7) yes . . .
Ir(2) C(15) C(20) 128.0(10) yes . . .
C(11) C(15) C(14) 108.4(9) yes . . .
C(11) C(15) C(20) 123.7(11) yes . . .
C(14) C(15) C(20) 127.8(11) yes . . .
P(1) C(23) P(2) 122.1(6) yes . . .
Ir(1) C(26) O(1) 117.6(8) yes . . .
Ir(1) C(26) C(27) 131.2(8) yes . . .
O(1) C(26) C(27) 109.4(9) yes . . .
Ir(2) C(27) C(26) 102.7(6) yes . . .
Ir(2) C(27) C(28) 116.5(8) yes . . .
C(26) C(27) C(28) 106.9(10) yes . . .
C(27) C(28) C(29) 99.1(9) yes . . .
O(1) C(29) C(28) 106.7(10) yes . . .
S(1) C(30) F(1) 111.5(8) yes . . .
S(1) C(30) F(2) 109.5(8) yes . . .
S(1) C(30) F(3) 112.4(8) yes . . .
F(1) C(30) F(2) 106.7(9) yes . . .
F(1) C(30) F(3) 108.7(10) yes . . .
F(2) C(30) F(3) 107.8(10) yes . . .
C(1) C(6) H(1) 108.6 no . . .
C(1) C(6) H(2) 110.0 no . . .
C(1) C(6) H(3) 109.8 no . . .
H(1) C(6) H(2) 109.5 no . . .
H(1) C(6) H(3) 109.5 no . . .
H(2) C(6) H(3) 109.5 no . . .
C(2) C(7) H(4) 109.9 no . . .
C(2) C(7) H(5) 109.3 no . . .
C(2) C(7) H(6) 109.3 no . . .
H(4) C(7) H(5) 109.5 no . . .
H(4) C(7) H(6) 109.5 no . . .
H(5) C(7) H(6) 109.5 no . . .
C(3) C(8) H(7) 109.2 no . . .
C(3) C(8) H(8) 109.3 no . . .
C(3) C(8) H(9) 109.8 no . . .
H(7) C(8) H(8) 109.5 no . . .
H(7) C(8) H(9) 109.5 no . . .
H(8) C(8) H(9) 109.5 no . . .
C(4) C(9) H(10) 109.7 no . . .
C(4) C(9) H(11) 109.2 no . . .
C(4) C(9) H(12) 109.5 no . . .
H(10) C(9) H(11) 109.5 no . . .
H(10) C(9) H(12) 109.5 no . . .
H(11) C(9) H(12) 109.5 no . . .
C(5) C(10) H(13) 110.0 no . . .
C(5) C(10) H(14) 109.3 no . . .
C(5) C(10) H(15) 109.1 no . . .
H(13) C(10) H(14) 109.5 no . . .
H(13) C(10) H(15) 109.5 no . . .
H(14) C(10) H(15) 109.5 no . . .
C(11) C(16) H(16) 109.8 no . . .
C(11) C(16) H(17) 109.0 no . . .
C(11) C(16) H(18) 109.6 no . . .
H(16) C(16) H(17) 109.5 no . . .
H(16) C(16) H(18) 109.5 no . . .
H(17) C(16) H(18) 109.5 no . . .
C(12) C(17) H(19) 109.8 no . . .
C(12) C(17) H(20) 109.0 no . . .
C(12) C(17) H(21) 109.7 no . . .
H(19) C(17) H(20) 109.5 no . . .
H(19) C(17) H(21) 109.5 no . . .
H(20) C(17) H(21) 109.5 no . . .
C(13) C(18) H(22) 109.1 no . . .
C(13) C(18) H(23) 109.4 no . . .
C(13) C(18) H(24) 109.8 no . . .
H(22) C(18) H(23) 109.5 no . . .
H(22) C(18) H(24) 109.5 no . . .
H(23) C(18) H(24) 109.5 no . . .
C(14) C(19) H(25) 107.9 no . . .
C(14) C(19) H(26) 110.1 no . . .
C(14) C(19) H(27) 110.4 no . . .
H(25) C(19) H(26) 109.5 no . . .
H(25) C(19) H(27) 109.5 no . . .
H(26) C(19) H(27) 109.5 no . . .
C(15) C(20) H(28) 109.7 no . . .
C(15) C(20) H(29) 108.9 no . . .
C(15) C(20) H(30) 109.8 no . . .
H(28) C(20) H(29) 109.5 no . . .
H(28) C(20) H(30) 109.5 no . . .
H(29) C(20) H(30) 109.5 no . . .
P(1) C(21) H(31) 109.6 no . . .
P(1) C(21) H(32) 109.4 no . . .
P(1) C(21) H(33) 109.4 no . . .
H(31) C(21) H(32) 109.5 no . . .
H(31) C(21) H(33) 109.5 no . . .
H(32) C(21) H(33) 109.5 no . . .
P(1) C(22) H(34) 109.5 no . . .
P(1) C(22) H(35) 109.4 no . . .
P(1) C(22) H(36) 109.5 no . . .
H(34) C(22) H(35) 109.5 no . . .
H(34) C(22) H(36) 109.5 no . . .
H(35) C(22) H(36) 109.5 no . . .
P(1) C(23) H(37) 105.9 no . . .
P(1) C(23) H(38) 106.4 no . . .
P(2) C(23) H(37) 105.9 no . . .
P(2) C(23) H(38) 106.6 no . . .
H(37) C(23) H(38) 109.5 no . . .
P(2) C(24) H(39) 109.2 no . . .
P(2) C(24) H(40) 109.7 no . . .
P(2) C(24) H(41) 109.5 no . . .
H(39) C(24) H(40) 109.5 no . . .
H(39) C(24) H(41) 109.5 no . . .
H(40) C(24) H(41) 109.5 no . . .
P(2) C(25) H(42) 110.0 no . . .
P(2) C(25) H(43) 109.7 no . . .
P(2) C(25) H(44) 108.7 no . . .
H(42) C(25) H(43) 109.5 no . . .
H(42) C(25) H(44) 109.5 no . . .
H(43) C(25) H(44) 109.5 no . . .
Ir(2) C(27) H(45) 110.2 no . . .
C(26) C(27) H(45) 109.9 no . . .
C(28) C(27) H(45) 110.2 no . . .
C(27) C(28) H(46) 111.9 no . . .
C(27) C(28) H(47) 112.1 no . . .
C(29) C(28) H(46) 111.2 no . . .
C(29) C(28) H(47) 112.9 no . . .
H(46) C(28) H(47) 109.5 no . . .
O(1) C(29) H(48) 109.7 no . . .
O(1) C(29) H(49) 110.4 no . . .
C(28) C(29) H(48) 109.6 no . . .
C(28) C(29) H(49) 110.9 no . . .
H(48) C(29) H(49) 109.5 no . . .
