# Supplementary material
Source: MDPI journal article supplement (https://www.mdpi.com/2304-6740/7/10/121)
Supplement: s1 [file s1 › X-ray data of 4.cif]

#==============================================================================

data_4

_publ_author_name    Ken-ichi Fujita

#==============================================================================

# CHEMICAL DATA

_chemical_formula_sum                  'C30 H51 F3 Ir2 O4 P2 S '
_chemical_formula_moiety               'C30 H51 F3 Ir2 O4 P2 S '
_chemical_formula_weight               1011.17
_chemical_melting_point                ?

#==============================================================================

# CRYSTAL DATA
_symmetry_cell_setting                 monoclinic
_symmetry_space_group_name_H-M        'P 1 21/c 1'
_symmetry_space_group_name_Hall       '-P 2ybc'
_symmetry_Int_Tables_number            14
loop_
_symmetry_equiv_pos_site_id
_symmetry_equiv_pos_as_xyz
1   '+X,+Y,+Z'
2   '-X,1/2+Y,1/2-Z'
3   '-X,-Y,-Z'
4   '+X,1/2-Y,1/2+Z'

#------------------------------------------------------------------------------

_cell_length_a                         17.2066(5)
_cell_length_b                         13.4578(3)
_cell_length_c                         17.4402(4)
_cell_angle_alpha                      90.0000
_cell_angle_beta                       118.3955(8)
_cell_angle_gamma                      90.0000
_cell_volume                           3552.61(16)
_cell_formula_units_Z                  4
_cell_measurement_reflns_used          27137
_cell_measurement_theta_min            3.0
_cell_measurement_theta_max            27.5
_cell_measurement_temperature          173.1

#------------------------------------------------------------------------------

_exptl_crystal_description            'block'
_exptl_crystal_colour                 'orange'
_exptl_crystal_size_max                0.35
_exptl_crystal_size_mid                0.15
_exptl_crystal_size_min                0.15
_exptl_crystal_density_diffrn          1.890
_exptl_crystal_density_meas            ?
_exptl_crystal_density_method         'not measured'
_exptl_crystal_F_000                   1960.00
_exptl_absorpt_coefficient_mu          7.701
_exptl_absorpt_correction_type         multi-scan
_exptl_absorpt_process_details         
;
    Higashi, T. (1995). Program for Absorption Correction.
    Rigaku Corporation, Tokyo, Japan.
;
_exptl_absorpt_correction_T_min        0.131
_exptl_absorpt_correction_T_max        0.315

#==============================================================================

# EXPERIMENTAL DATA

_diffrn_ambient_temperature      173.1
_diffrn_radiation_type                'Mo K\a'
_diffrn_radiation_wavelength           0.71075
_diffrn_measurement_device_type       'Rigaku RAXIS-RAPID'
_diffrn_measurement_method             \w
_diffrn_detector_area_resol_mean       10.00
_diffrn_reflns_number                  33301
_diffrn_reflns_av_R_equivalents        0.042
_diffrn_reflns_theta_max               27.47
_diffrn_measured_fraction_theta_max    0.997
_diffrn_reflns_theta_full              27.47
_diffrn_measured_fraction_theta_full   0.997
_diffrn_reflns_limit_h_min             -22
_diffrn_reflns_limit_h_max             22
_diffrn_reflns_limit_k_min             -17
_diffrn_reflns_limit_k_max             17
_diffrn_reflns_limit_l_min             -22
_diffrn_reflns_limit_l_max             22

#==============================================================================

# REFINEMENT DATA

_refine_special_details
;
    Refinement was performed using reflections with F^2^ > 2.0 sigma(F^2^).
    The weighted R-factor(wR), goodness of fit (S) and R-factor (gt) are 
    based on F, with F set to zero for negative F. The threshold expression of
    F^2^ > 2.0 sigma(F^2^) is used only for calculating R-factor (gt).
;
_reflns_number_total                   8112
_reflns_number_gt                      6327
_reflns_threshold_expression           F^2^>2.0\s(F^2^)
_refine_ls_structure_factor_coef       F
_refine_ls_R_factor_gt                 0.0411
_refine_ls_wR_factor_ref               0.0629
_refine_ls_hydrogen_treatment          refall
_refine_ls_number_reflns               6354
_refine_ls_number_parameters           449
_refine_ls_goodness_of_fit_ref         1.003
_refine_ls_weighting_scheme            calc
_refine_ls_weighting_details
'w = 1/[0.0020Fo^2^ + 1.0000\s(Fo^2^)]'
_refine_ls_shift/su_max                0.0005
_refine_diff_density_max               3.37
_refine_diff_density_min               -1.12
_refine_ls_extinction_method           none
_refine_ls_extinction_coef             ?

loop_
_atom_type_symbol
_atom_type_description
_atom_type_scat_dispersion_real
_atom_type_scat_dispersion_imag
_atom_type_scat_source
  'C' 'C'  0.003 0.002 
;
International Tables for Crystallography
(1992, Vol. C, Tables 4.2.6.8 and 6.1.1.4)
;
  'H' 'H'  0.000 0.000 
;
International Tables for Crystallography
(1992, Vol. C, Table 6.1.1.4)
;
  'P' 'P'  0.102 0.094 
;
International Tables for Crystallography
(1992, Vol. C, Tables 4.2.6.8 and 6.1.1.4)
;
  'Ir' 'Ir'  -1.444 7.990 
;
International Tables for Crystallography
(1992, Vol. C, Tables 4.2.6.8 and 6.1.1.4)
;
  'F' 'F'  0.017 0.010 
;
International Tables for Crystallography
(1992, Vol. C, Tables 4.2.6.8 and 6.1.1.4)
;
  'S' 'S'  0.125 0.123 
;
International Tables for Crystallography
(1992, Vol. C, Tables 4.2.6.8 and 6.1.1.4)
;
  'O' 'O'  0.011 0.006 
;
International Tables for Crystallography
(1992, Vol. C, Tables 4.2.6.8 and 6.1.1.4)
;

#==============================================================================

# ATOMIC COORDINATES AND THERMAL PARAMETERS

loop_
_atom_site_label
_atom_site_type_symbol
_atom_site_fract_x
_atom_site_fract_y
_atom_site_fract_z
_atom_site_U_iso_or_equiv
_atom_site_adp_type
_atom_site_occupancy
_atom_site_symmetry_multiplicity
_atom_site_calc_flag
_atom_site_refinement_flags
_atom_site_disorder_assembly
_atom_site_disorder_group
 Ir(1) Ir 0.15626(2) 0.25618(2) 0.36913(2) 0.02696(8) Uani 1.00 1 d . . .
 Ir(2) Ir 0.34171(2) 0.25903(2) 0.48004(2) 0.02714(8) Uani 1.00 1 d . . .
 S(1) S 0.77067(13) 0.17586(12) 0.35643(12) 0.0384(4) Uani 1.00 1 d . . .
 P(1) P 0.14011(13) 0.10130(13) 0.40827(12) 0.0337(4) Uani 1.00 1 d . . .
 P(2) P 0.33163(13) 0.11848(13) 0.54332(11) 0.0336(4) Uani 1.00 1 d . . .
 F(1) F 0.8094(5) 0.3358(4) 0.4491(4) 0.106(2) Uani 1.00 1 d . . .
 F(2) F 0.6727(4) 0.2973(5) 0.3895(4) 0.099(2) Uani 1.00 1 d . . .
 F(3) F 0.7671(5) 0.2156(4) 0.5007(3) 0.095(2) Uani 1.00 1 d . . .
 O(1) O 0.2677(6) -0.0726(4) 0.3004(5) 0.108(3) Uani 1.00 1 d . . .
 O(2) O 0.8608(3) 0.1436(4) 0.4091(3) 0.0576(18) Uani 1.00 1 d . . .
 O(3) O 0.7557(4) 0.2376(3) 0.2845(4) 0.0544(19) Uani 1.00 1 d . . .
 O(4) O 0.7053(3) 0.1005(3) 0.3374(3) 0.0544(17) Uani 1.00 1 d . . .
 C(1) C 0.1154(4) 0.3901(4) 0.2786(4) 0.0328(17) Uani 1.00 1 d . . .
 C(2) C 0.1045(4) 0.4145(5) 0.3529(4) 0.0366(19) Uani 1.00 1 d . . .
 C(3) C 0.0402(4) 0.3505(4) 0.3549(4) 0.0366(19) Uani 1.00 1 d . . .
 C(4) C 0.0131(4) 0.2829(5) 0.2833(4) 0.0397(19) Uani 1.00 1 d . . .
 C(5) C 0.0601(4) 0.3068(5) 0.2362(4) 0.0385(19) Uani 1.00 1 d . . .
 C(6) C 0.1667(5) 0.4475(5) 0.2429(5) 0.048(2) Uani 1.00 1 d . . .
 C(7) C 0.1424(6) 0.5011(5) 0.4127(5) 0.053(2) Uani 1.00 1 d . . .
 C(8) C 0.0018(5) 0.3590(6) 0.4157(5) 0.056(2) Uani 1.00 1 d . . .
 C(9) C -0.0648(5) 0.2156(6) 0.2525(5) 0.052(2) Uani 1.00 1 d . . .
 C(10) C 0.0427(6) 0.2636(5) 0.1499(5) 0.052(2) Uani 1.00 1 d . . .
 C(11) C 0.4388(5) 0.3386(6) 0.4496(5) 0.052(2) Uani 1.00 1 d . . .
 C(12) C 0.4837(5) 0.2750(6) 0.5208(6) 0.053(2) Uani 1.00 1 d . . .
 C(13) C 0.4706(5) 0.3088(5) 0.5910(4) 0.045(2) Uani 1.00 1 d . . .
 C(14) C 0.4158(5) 0.3939(5) 0.5612(5) 0.042(2) Uani 1.00 1 d . . .
 C(15) C 0.3973(5) 0.4158(5) 0.4743(5) 0.048(2) Uani 1.00 1 d . . .
 C(16) C 0.4401(7) 0.3380(9) 0.3642(6) 0.096(4) Uani 1.00 1 d . . .
 C(17) C 0.5476(6) 0.1957(7) 0.5245(9) 0.101(4) Uani 1.00 1 d . . .
 C(18) C 0.5186(7) 0.2764(8) 0.6836(6) 0.083(3) Uani 1.00 1 d . . .
 C(19) C 0.3906(7) 0.4581(6) 0.6180(7) 0.081(3) Uani 1.00 1 d . . .
 C(20) C 0.3618(6) 0.5099(7) 0.4270(7) 0.094(3) Uani 1.00 1 d . . .
 C(21) C 0.0841(6) 0.0112(6) 0.3222(6) 0.067(2) Uani 1.00 1 d . . .
 C(22) C 0.0796(6) 0.0929(6) 0.4702(6) 0.062(3) Uani 1.00 1 d . . .
 C(23) C 0.2414(4) 0.0367(4) 0.4721(4) 0.038(2) Uani 1.00 1 d . . .
 C(24) C 0.4218(5) 0.0326(6) 0.5851(6) 0.057(2) Uani 1.00 1 d . . .
 C(25) C 0.3128(6) 0.1411(6) 0.6365(4) 0.055(2) Uani 1.00 1 d . . .
 C(26) C 0.2611(4) 0.1986(4) 0.3619(4) 0.0306(17) Uani 1.00 1 d . . .
 C(27) C 0.2719(6) 0.1426(5) 0.3043(5) 0.055(2) Uani 1.00 1 d . . .
 C(28) C 0.3376(8) 0.0883(8) 0.3040(8) 0.042(3) Uani 0.61 1 d P . 1
 C(29) C 0.314(2) -0.0149(9) 0.2621(15) 0.043(6) Uani 0.61 1 d P . 1
 C(30) C 0.2329(12) 0.0959(12) 0.2288(10) 0.035(4) Uani 0.39 1 d P . 2
 C(31) C 0.255(3) -0.0124(16) 0.221(2) 0.046(9) Uani 0.39 1 d P . 2
 C(32) C 0.7526(7) 0.2589(5) 0.4263(6) 0.061(3) Uani 1.00 1 d . . .
 H(1) H 0.2001 0.4996 0.2813 0.061 Uiso 1.00 1 c R . .
 H(2) H 0.1262 0.4748 0.1880 0.061 Uiso 1.00 1 c R . .
 H(3) H 0.2055 0.4030 0.2355 0.061 Uiso 1.00 1 c R . .
 H(4) H 0.1201 0.5034 0.4532 0.060 Uiso 1.00 1 c R . .
 H(5) H 0.1270 0.5607 0.3795 0.061 Uiso 1.00 1 c R . .
 H(6) H 0.2048 0.4945 0.4433 0.061 Uiso 1.00 1 c R . .
 H(7) H -0.0439 0.3111 0.4001 0.070 Uiso 1.00 1 c R . .
 H(8) H -0.0221 0.4238 0.4105 0.070 Uiso 1.00 1 c R . .
 H(9) H 0.0459 0.3481 0.4742 0.070 Uiso 1.00 1 c R . .
 H(10) H -0.0749 0.1862 0.1990 0.062 Uiso 1.00 1 c R . .
 H(11) H -0.1152 0.2531 0.2435 0.062 Uiso 1.00 1 c R . .
 H(12) H -0.0543 0.1649 0.2942 0.062 Uiso 1.00 1 c R . .
 H(13) H 0.0804 0.2932 0.1305 0.059 Uiso 1.00 1 c R . .
 H(14) H -0.0172 0.2752 0.1082 0.059 Uiso 1.00 1 c R . .
 H(15) H 0.0534 0.1941 0.1567 0.059 Uiso 1.00 1 c R . .
 H(16) H 0.4751 0.2843 0.3625 0.127 Uiso 1.00 1 c R . .
 H(17) H 0.4639 0.3989 0.3572 0.127 Uiso 1.00 1 c R . .
 H(18) H 0.3812 0.3307 0.3185 0.127 Uiso 1.00 1 c R . .
 H(19) H 0.5738 0.1639 0.5798 0.127 Uiso 1.00 1 c R . .
 H(20) H 0.5923 0.2259 0.5152 0.127 Uiso 1.00 1 c R . .
 H(21) H 0.5167 0.1480 0.4802 0.127 Uiso 1.00 1 c R . .
 H(22) H 0.5010 0.3158 0.7179 0.087 Uiso 1.00 1 c R . .
 H(23) H 0.5805 0.2831 0.7050 0.087 Uiso 1.00 1 c R . .
 H(24) H 0.5047 0.2087 0.6868 0.087 Uiso 1.00 1 c R . .
 H(25) H 0.3540 0.5111 0.5838 0.103 Uiso 1.00 1 c R . .
 H(26) H 0.4427 0.4845 0.6651 0.103 Uiso 1.00 1 c R . .
 H(27) H 0.3596 0.4196 0.6403 0.103 Uiso 1.00 1 c R . .
 H(28) H 0.3627 0.5101 0.3729 0.095 Uiso 1.00 1 c R . .
 H(29) H 0.3973 0.5628 0.4623 0.095 Uiso 1.00 1 c R . .
 H(30) H 0.3029 0.5182 0.4168 0.095 Uiso 1.00 1 c R . .
 H(31) H 0.0223 0.0124 0.3026 0.076 Uiso 1.00 1 c R . .
 H(32) H 0.1066 -0.0532 0.3437 0.076 Uiso 1.00 1 c R . .
 H(33) H 0.0951 0.0268 0.2751 0.076 Uiso 1.00 1 c R . .
 H(34) H 0.1203 0.0974 0.5305 0.087 Uiso 1.00 1 c R . .
 H(35) H 0.0497 0.0309 0.4584 0.087 Uiso 1.00 1 c R . .
 H(36) H 0.0378 0.1454 0.4542 0.087 Uiso 1.00 1 c R . .
 H(37) H 0.2324 -0.0112 0.5071 0.050 Uiso 1.00 1 c R . .
 H(38) H 0.2580 0.0040 0.4338 0.050 Uiso 1.00 1 c R . .
 H(39) H 0.4148 -0.0137 0.5411 0.065 Uiso 1.00 1 c R . .
 H(40) H 0.4230 -0.0020 0.6331 0.065 Uiso 1.00 1 c R . .
 H(41) H 0.4757 0.0678 0.6038 0.065 Uiso 1.00 1 c R . .
 H(42) H 0.3678 0.1463 0.6883 0.068 Uiso 1.00 1 c R . .
 H(43) H 0.2799 0.0873 0.6419 0.068 Uiso 1.00 1 c R . .
 H(44) H 0.2804 0.2010 0.6277 0.068 Uiso 1.00 1 c R . .
 H(45) H 0.248(5) 0.287(6) 0.491(5) 0.06(2) Uiso 1.00 1 d . . .


loop_
_atom_site_aniso_label
_atom_site_aniso_U_11
_atom_site_aniso_U_22
_atom_site_aniso_U_33
_atom_site_aniso_U_12
_atom_site_aniso_U_13
_atom_site_aniso_U_23
 Ir(1) 0.02492(17) 0.02703(16) 0.02804(16) -0.00464(9) 0.01187(13) 0.00010(9)
 Ir(2) 0.02471(17) 0.02631(15) 0.03071(17) -0.00336(9) 0.01342(13) -0.00192(9)
 S(1) 0.0383(10) 0.0294(8) 0.0503(10) 0.0020(7) 0.0234(9) 0.0006(7)
 P(1) 0.0326(10) 0.0307(8) 0.0396(9) -0.0086(7) 0.0186(8) -0.0004(7)
 P(2) 0.0353(10) 0.0287(8) 0.0351(9) 0.0016(7) 0.0153(8) 0.0023(7)
 F(1) 0.153(7) 0.061(3) 0.116(5) -0.028(4) 0.075(5) -0.038(3)
 F(2) 0.115(5) 0.089(4) 0.126(5) 0.046(4) 0.085(4) 0.002(4)
 F(3) 0.163(7) 0.077(3) 0.071(3) 0.023(4) 0.076(4) -0.001(3)
 O(1) 0.221(10) 0.043(3) 0.146(6) -0.011(4) 0.157(7) -0.014(3)
 O(2) 0.042(3) 0.059(3) 0.065(3) 0.010(2) 0.019(3) 0.004(2)
 O(3) 0.065(4) 0.046(3) 0.062(3) 0.007(2) 0.039(3) 0.017(2)
 O(4) 0.049(3) 0.043(3) 0.063(3) -0.009(2) 0.021(3) 0.005(2)
 C(1) 0.029(3) 0.033(3) 0.036(3) 0.003(2) 0.015(3) 0.005(2)
 C(2) 0.034(4) 0.034(3) 0.041(3) 0.008(2) 0.017(3) 0.006(2)
 C(3) 0.038(4) 0.034(3) 0.042(3) 0.007(3) 0.023(3) 0.005(2)
 C(4) 0.025(3) 0.038(3) 0.048(4) -0.006(3) 0.010(3) 0.001(3)
 C(5) 0.029(4) 0.042(3) 0.039(3) 0.001(3) 0.011(3) 0.003(3)
 C(6) 0.047(5) 0.051(4) 0.055(4) 0.001(3) 0.032(4) 0.012(3)
 C(7) 0.057(5) 0.046(4) 0.048(4) -0.008(3) 0.019(4) 0.001(3)
 C(8) 0.053(5) 0.063(5) 0.059(5) 0.003(4) 0.033(4) -0.012(4)
 C(9) 0.027(4) 0.076(5) 0.052(4) -0.018(4) 0.017(3) -0.011(4)
 C(10) 0.046(5) 0.061(5) 0.041(4) 0.016(3) 0.014(4) 0.007(3)
 C(11) 0.038(4) 0.075(5) 0.051(4) -0.026(4) 0.027(4) -0.007(4)
 C(12) 0.035(4) 0.042(4) 0.088(6) -0.017(3) 0.034(5) -0.025(4)
 C(13) 0.040(4) 0.042(4) 0.048(4) -0.013(3) 0.017(3) 0.000(3)
 C(14) 0.032(4) 0.039(3) 0.057(4) -0.012(3) 0.022(3) -0.011(3)
 C(15) 0.031(4) 0.040(3) 0.059(4) -0.018(3) 0.009(3) 0.007(3)
 C(16) 0.099(9) 0.156(11) 0.062(6) -0.082(8) 0.061(6) -0.041(6)
 C(17) 0.054(6) 0.069(6) 0.195(13) -0.019(5) 0.071(8) -0.055(8)
 C(18) 0.062(7) 0.103(7) 0.053(5) -0.032(6) 0.001(5) 0.022(5)
 C(19) 0.072(7) 0.050(5) 0.135(9) -0.019(4) 0.060(7) -0.048(5)
 C(20) 0.041(6) 0.061(6) 0.134(10) -0.020(4) 0.005(6) 0.039(6)
 C(21) 0.060(6) 0.056(5) 0.073(6) -0.027(4) 0.021(5) -0.022(4)
 C(22) 0.062(6) 0.066(5) 0.089(6) -0.000(4) 0.060(5) 0.017(4)
 C(23) 0.046(4) 0.027(3) 0.051(4) -0.006(3) 0.031(3) -0.004(2)
 C(24) 0.049(5) 0.044(4) 0.069(5) 0.000(3) 0.020(4) 0.005(4)
 C(25) 0.084(7) 0.048(4) 0.039(4) -0.008(4) 0.033(4) -0.002(3)
 C(26) 0.040(4) 0.023(2) 0.033(3) -0.002(2) 0.021(3) 0.002(2)
 C(27) 0.096(7) 0.032(3) 0.065(5) -0.003(4) 0.060(5) -0.001(3)
 C(28) 0.038(7) 0.041(6) 0.053(7) -0.006(5) 0.028(6) -0.017(5)
 C(29) 0.061(19) 0.028(5) 0.047(11) 0.004(6) 0.031(13) -0.008(5)
 C(30) 0.034(11) 0.027(8) 0.035(9) -0.007(7) 0.010(8) -0.007(6)
 C(31) 0.05(2) 0.031(9) 0.06(2) -0.018(11) 0.03(2) -0.021(10)
 C(32) 0.089(9) 0.034(4) 0.065(6) 0.012(4) 0.039(7) 0.003(3)

#==============================================================================

_computing_data_collection            'PROCESS-AUTO'
_computing_cell_refinement            'PROCESS-AUTO'
_computing_data_reduction             'CrystalStructure'
_computing_structure_solution         'DIRDIF99 (PATTY)'
_computing_structure_refinement       'CRYSTALS'
_computing_publication_material       'CrystalStructure 3.8'
_computing_molecular_graphics          ?

#==============================================================================

# MOLECULAR GEOMETRY

_geom_special_details
;
    ENTER SPECIAL DETAILS OF THE MOLECULAR GEOMETRY
;

loop_
_geom_bond_atom_site_label_1
_geom_bond_atom_site_label_2
_geom_bond_distance
_geom_bond_publ_flag
_geom_bond_site_symmetry_1
_geom_bond_site_symmetry_2
Ir(1) Ir(2) 2.8381(3) yes . .
Ir(1) P(1) 2.2512(19) yes . .
Ir(1) C(1) 2.276(6) yes . .
Ir(1) C(2) 2.274(6) yes . .
Ir(1) C(3) 2.278(8) yes . .
Ir(1) C(4) 2.220(6) yes . .
Ir(1) C(5) 2.220(6) yes . .
Ir(1) C(26) 2.022(8) yes . .
Ir(2) P(2) 2.2378(19) yes . .
Ir(2) C(11) 2.250(10) yes . .
Ir(2) C(12) 2.206(9) yes . .
Ir(2) C(13) 2.243(6) yes . .
Ir(2) C(14) 2.282(6) yes . .
Ir(2) C(15) 2.338(8) yes . .
Ir(2) C(26) 2.029(5) yes . .
S(1) O(2) 1.443(5) yes . .
S(1) O(3) 1.422(6) yes . .
S(1) O(4) 1.431(6) yes . .
S(1) C(32) 1.786(11) yes . .
P(1) C(21) 1.810(8) yes . .
P(1) C(22) 1.825(13) yes . .
P(1) C(23) 1.785(6) yes . .
P(2) C(23) 1.826(6) yes . .
P(2) C(24) 1.789(8) yes . .
P(2) C(25) 1.828(10) yes . .
F(1) C(32) 1.348(11) yes . .
F(2) C(32) 1.315(12) yes . .
F(3) C(32) 1.333(12) yes . .
O(1) C(29) 1.49(3) yes . .
O(1) C(31) 1.53(4) yes . .
C(1) C(2) 1.433(12) yes . .
C(1) C(5) 1.428(9) yes . .
C(1) C(6) 1.513(13) yes . .
C(2) C(3) 1.415(11) yes . .
C(2) C(7) 1.492(10) yes . .
C(3) C(4) 1.432(10) yes . .
C(3) C(8) 1.497(15) yes . .
C(4) C(5) 1.437(14) yes . .
C(4) C(9) 1.490(11) yes . .
C(5) C(10) 1.505(12) yes . .
C(11) C(12) 1.399(12) yes . .
C(11) C(15) 1.439(13) yes . .
C(11) C(16) 1.499(15) yes . .
C(12) C(13) 1.421(15) yes . .
C(12) C(17) 1.512(15) yes . .
C(13) C(14) 1.416(10) yes . .
C(13) C(18) 1.487(12) yes . .
C(14) C(15) 1.424(12) yes . .
C(14) C(19) 1.524(16) yes . .
C(15) C(20) 1.476(12) yes . .
C(26) C(27) 1.337(13) yes . .
C(27) C(28) 1.348(18) yes . .
C(27) C(30) 1.319(18) yes . .
C(28) C(29) 1.531(19) yes . .
C(28) C(30) 1.652(19) yes . .
C(29) C(31) 0.93(5) yes . .
C(30) C(31) 1.53(3) yes . .
Ir(2) H(45) 1.75(10) no . .
C(6) H(1) 0.950 no . .
C(6) H(2) 0.950 no . .
C(6) H(3) 0.950 no . .
C(7) H(4) 0.950 no . .
C(7) H(5) 0.950 no . .
C(7) H(6) 0.950 no . .
C(8) H(7) 0.950 no . .
C(8) H(8) 0.950 no . .
C(8) H(9) 0.950 no . .
C(9) H(10) 0.950 no . .
C(9) H(11) 0.950 no . .
C(9) H(12) 0.950 no . .
C(10) H(13) 0.950 no . .
C(10) H(14) 0.950 no . .
C(10) H(15) 0.950 no . .
C(16) H(16) 0.950 no . .
C(16) H(17) 0.950 no . .
C(16) H(18) 0.950 no . .
C(17) H(19) 0.950 no . .
C(17) H(20) 0.950 no . .
C(17) H(21) 0.950 no . .
C(18) H(22) 0.950 no . .
C(18) H(23) 0.950 no . .
C(18) H(24) 0.950 no . .
C(19) H(25) 0.950 no . .
C(19) H(26) 0.950 no . .
C(19) H(27) 0.950 no . .
C(20) H(28) 0.950 no . .
C(20) H(29) 0.950 no . .
C(20) H(30) 0.950 no . .
C(21) H(31) 0.950 no . .
C(21) H(32) 0.950 no . .
C(21) H(33) 0.950 no . .
C(22) H(34) 0.950 no . .
C(22) H(35) 0.950 no . .
C(22) H(36) 0.950 no . .
C(23) H(37) 0.950 no . .
C(23) H(38) 0.950 no . .
C(24) H(39) 0.950 no . .
C(24) H(40) 0.950 no . .
C(24) H(41) 0.950 no . .
C(25) H(42) 0.950 no . .
C(25) H(43) 0.950 no . .
C(25) H(44) 0.950 no . .

loop_
_geom_angle_atom_site_label_1
_geom_angle_atom_site_label_2
_geom_angle_atom_site_label_3
_geom_angle
_geom_angle_publ_flag
_geom_angle_site_symmetry_1
_geom_angle_site_symmetry_2
_geom_angle_site_symmetry_3
Ir(2) Ir(1) P(1) 93.83(4) yes . . .
Ir(2) Ir(1) C(1) 109.77(17) yes . . .
Ir(2) Ir(1) C(2) 108.61(16) yes . . .
Ir(2) Ir(1) C(3) 135.23(15) yes . . .
Ir(2) Ir(1) C(4) 169.92(19) yes . . .
Ir(2) Ir(1) C(5) 138.2(2) yes . . .
Ir(2) Ir(1) C(26) 45.62(16) yes . . .
P(1) Ir(1) C(1) 154.38(15) yes . . .
P(1) Ir(1) C(2) 143.8(2) yes . . .
P(1) Ir(1) C(3) 108.7(2) yes . . .
P(1) Ir(1) C(4) 95.5(2) yes . . .
P(1) Ir(1) C(5) 117.56(19) yes . . .
P(1) Ir(1) C(26) 84.6(2) yes . . .
C(1) Ir(1) C(2) 36.7(3) yes . . .
C(1) Ir(1) C(3) 61.2(3) yes . . .
C(1) Ir(1) C(4) 61.8(2) yes . . .
C(1) Ir(1) C(5) 37.0(2) yes . . .
C(1) Ir(1) C(26) 104.5(3) yes . . .
C(2) Ir(1) C(3) 36.2(2) yes . . .
C(2) Ir(1) C(4) 61.4(2) yes . . .
C(2) Ir(1) C(5) 61.9(2) yes . . .
C(2) Ir(1) C(26) 131.3(3) yes . . .
C(3) Ir(1) C(4) 37.1(2) yes . . .
C(3) Ir(1) C(5) 62.4(3) yes . . .
C(3) Ir(1) C(26) 165.7(2) yes . . .
C(4) Ir(1) C(5) 37.8(3) yes . . .
C(4) Ir(1) C(26) 139.2(2) yes . . .
C(5) Ir(1) C(26) 107.2(3) yes . . .
Ir(1) Ir(2) P(2) 89.94(4) yes . . .
Ir(1) Ir(2) C(11) 124.46(17) yes . . .
Ir(1) Ir(2) C(12) 159.2(3) yes . . .
Ir(1) Ir(2) C(13) 157.2(2) yes . . .
Ir(1) Ir(2) C(14) 123.28(19) yes . . .
Ir(1) Ir(2) C(15) 109.46(17) yes . . .
Ir(1) Ir(2) C(26) 45.4(2) yes . . .
P(2) Ir(2) C(11) 139.4(2) yes . . .
P(2) Ir(2) C(12) 104.9(2) yes . . .
P(2) Ir(2) C(13) 95.9(2) yes . . .
P(2) Ir(2) C(14) 121.2(2) yes . . .
P(2) Ir(2) C(15) 155.93(18) yes . . .
P(2) Ir(2) C(26) 89.21(19) yes . . .
C(11) Ir(2) C(12) 36.6(3) yes . . .
C(11) Ir(2) C(13) 61.4(3) yes . . .
C(11) Ir(2) C(14) 60.6(3) yes . . .
C(11) Ir(2) C(15) 36.5(3) yes . . .
C(11) Ir(2) C(26) 100.2(3) yes . . .
C(12) Ir(2) C(13) 37.3(4) yes . . .
C(12) Ir(2) C(14) 61.1(3) yes . . .
C(12) Ir(2) C(15) 60.9(2) yes . . .
C(12) Ir(2) C(26) 118.9(3) yes . . .
C(13) Ir(2) C(14) 36.5(2) yes . . .
C(13) Ir(2) C(15) 60.7(2) yes . . .
C(13) Ir(2) C(26) 156.1(3) yes . . .
C(14) Ir(2) C(15) 35.9(3) yes . . .
C(14) Ir(2) C(26) 149.3(2) yes . . .
C(15) Ir(2) C(26) 114.5(2) yes . . .
O(2) S(1) O(3) 115.3(4) yes . . .
O(2) S(1) O(4) 115.0(3) yes . . .
O(2) S(1) C(32) 103.7(4) yes . . .
O(3) S(1) O(4) 114.6(3) yes . . .
O(3) S(1) C(32) 102.7(4) yes . . .
O(4) S(1) C(32) 103.2(5) yes . . .
Ir(1) P(1) C(21) 117.6(3) yes . . .
Ir(1) P(1) C(22) 115.1(2) yes . . .
Ir(1) P(1) C(23) 114.5(2) yes . . .
C(21) P(1) C(22) 102.7(4) yes . . .
C(21) P(1) C(23) 99.6(3) yes . . .
C(22) P(1) C(23) 105.3(4) yes . . .
Ir(2) P(2) C(23) 114.5(2) yes . . .
Ir(2) P(2) C(24) 119.4(3) yes . . .
Ir(2) P(2) C(25) 112.7(2) yes . . .
C(23) P(2) C(24) 100.4(3) yes . . .
C(23) P(2) C(25) 104.6(4) yes . . .
C(24) P(2) C(25) 103.4(4) yes . . .
C(29) O(1) C(31) 36(2) yes . . .
Ir(1) C(1) C(2) 71.6(3) yes . . .
Ir(1) C(1) C(5) 69.4(3) yes . . .
Ir(1) C(1) C(6) 130.0(5) yes . . .
C(2) C(1) C(5) 107.8(7) yes . . .
C(2) C(1) C(6) 127.5(6) yes . . .
C(5) C(1) C(6) 124.3(7) yes . . .
Ir(1) C(2) C(1) 71.7(3) yes . . .
Ir(1) C(2) C(3) 72.0(4) yes . . .
Ir(1) C(2) C(7) 129.1(4) yes . . .
C(1) C(2) C(3) 108.9(6) yes . . .
C(1) C(2) C(7) 127.5(8) yes . . .
C(3) C(2) C(7) 123.0(8) yes . . .
Ir(1) C(3) C(2) 71.7(4) yes . . .
Ir(1) C(3) C(4) 69.3(4) yes . . .
Ir(1) C(3) C(8) 128.7(4) yes . . .
C(2) C(3) C(4) 107.4(8) yes . . .
C(2) C(3) C(8) 125.8(6) yes . . .
C(4) C(3) C(8) 126.5(7) yes . . .
Ir(1) C(4) C(3) 73.6(3) yes . . .
Ir(1) C(4) C(5) 71.1(4) yes . . .
Ir(1) C(4) C(9) 131.6(5) yes . . .
C(3) C(4) C(5) 108.5(6) yes . . .
C(3) C(4) C(9) 124.4(9) yes . . .
C(5) C(4) C(9) 125.7(7) yes . . .
Ir(1) C(5) C(1) 73.6(3) yes . . .
Ir(1) C(5) C(4) 71.1(3) yes . . .
Ir(1) C(5) C(10) 128.4(5) yes . . .
C(1) C(5) C(4) 107.3(7) yes . . .
C(1) C(5) C(10) 126.0(8) yes . . .
C(4) C(5) C(10) 125.9(6) yes . . .
Ir(2) C(11) C(12) 70.0(6) yes . . .
Ir(2) C(11) C(15) 75.1(5) yes . . .
Ir(2) C(11) C(16) 126.5(6) yes . . .
C(12) C(11) C(15) 108.5(8) yes . . .
C(12) C(11) C(16) 128.0(9) yes . . .
C(15) C(11) C(16) 123.0(8) yes . . .
Ir(2) C(12) C(11) 73.4(5) yes . . .
Ir(2) C(12) C(13) 72.8(5) yes . . .
Ir(2) C(12) C(17) 128.0(6) yes . . .
C(11) C(12) C(13) 108.9(8) yes . . .
C(11) C(12) C(17) 123.5(11) yes . . .
C(13) C(12) C(17) 126.8(9) yes . . .
Ir(2) C(13) C(12) 70.0(4) yes . . .
Ir(2) C(13) C(14) 73.3(3) yes . . .
Ir(2) C(13) C(18) 131.4(7) yes . . .
C(12) C(13) C(14) 107.0(7) yes . . .
C(12) C(13) C(18) 127.4(8) yes . . .
C(14) C(13) C(18) 124.4(8) yes . . .
Ir(2) C(14) C(13) 70.3(3) yes . . .
Ir(2) C(14) C(15) 74.2(4) yes . . .
Ir(2) C(14) C(19) 127.3(6) yes . . .
C(13) C(14) C(15) 109.3(8) yes . . .
C(13) C(14) C(19) 124.4(7) yes . . .
C(15) C(14) C(19) 125.9(7) yes . . .
Ir(2) C(15) C(11) 68.4(4) yes . . .
Ir(2) C(15) C(14) 69.9(4) yes . . .
Ir(2) C(15) C(20) 136.9(5) yes . . .
C(11) C(15) C(14) 106.2(6) yes . . .
C(11) C(15) C(20) 125.8(9) yes . . .
C(14) C(15) C(20) 126.6(9) yes . . .
P(1) C(23) P(2) 113.1(3) yes . . .
Ir(1) C(26) Ir(2) 88.9(3) yes . . .
Ir(1) C(26) C(27) 135.2(5) yes . . .
Ir(2) C(26) C(27) 135.8(6) yes . . .
C(26) C(27) C(28) 136.4(8) yes . . .
C(26) C(27) C(30) 146.3(13) yes . . .
C(28) C(27) C(30) 76.5(11) yes . . .
C(27) C(28) C(29) 117.7(17) yes . . .
C(27) C(28) C(30) 50.9(8) yes . . .
C(29) C(28) C(30) 74.9(13) yes . . .
O(1) C(29) C(28) 109(2) yes . . .
O(1) C(29) C(31) 75(4) yes . . .
C(28) C(29) C(31) 106(2) yes . . .
C(27) C(30) C(28) 52.5(8) yes . . .
C(27) C(30) C(31) 121.1(18) yes . . .
C(28) C(30) C(31) 77.8(18) yes . . .
O(1) C(31) C(29) 69(3) yes . . .
O(1) C(31) C(30) 111(3) yes . . .
C(29) C(31) C(30) 101(2) yes . . .
S(1) C(32) F(1) 110.1(9) yes . . .
S(1) C(32) F(2) 113.2(6) yes . . .
S(1) C(32) F(3) 112.2(6) yes . . .
F(1) C(32) F(2) 106.5(7) yes . . .
F(1) C(32) F(3) 105.9(7) yes . . .
F(2) C(32) F(3) 108.4(11) yes . . .
Ir(1) Ir(2) H(45) 44(2) no . . .
P(2) Ir(2) H(45) 80(2) no . . .
C(11) Ir(2) H(45) 139(2) no . . .
C(12) Ir(2) H(45) 151(2) no . . .
C(13) Ir(2) H(45) 115(2) no . . .
C(14) Ir(2) H(45) 92(2) no . . .
C(15) Ir(2) H(45) 103(2) no . . .
C(26) Ir(2) H(45) 89(2) no . . .
C(1) C(6) H(1) 111.2 no . . .
C(1) C(6) H(2) 108.7 no . . .
C(1) C(6) H(3) 108.5 no . . .
H(1) C(6) H(2) 109.5 no . . .
H(1) C(6) H(3) 109.5 no . . .
H(2) C(6) H(3) 109.5 no . . .
C(2) C(7) H(4) 110.3 no . . .
C(2) C(7) H(5) 109.4 no . . .
C(2) C(7) H(6) 108.7 no . . .
H(4) C(7) H(5) 109.5 no . . .
H(4) C(7) H(6) 109.5 no . . .
H(5) C(7) H(6) 109.5 no . . .
C(3) C(8) H(7) 109.2 no . . .
C(3) C(8) H(8) 108.6 no . . .
C(3) C(8) H(9) 110.6 no . . .
H(7) C(8) H(8) 109.5 no . . .
H(7) C(8) H(9) 109.5 no . . .
H(8) C(8) H(9) 109.5 no . . .
C(4) C(9) H(10) 108.7 no . . .
C(4) C(9) H(11) 109.3 no . . .
C(4) C(9) H(12) 110.4 no . . .
H(10) C(9) H(11) 109.5 no . . .
H(10) C(9) H(12) 109.5 no . . .
H(11) C(9) H(12) 109.5 no . . .
C(5) C(10) H(13) 110.4 no . . .
C(5) C(10) H(14) 109.3 no . . .
C(5) C(10) H(15) 108.7 no . . .
H(13) C(10) H(14) 109.5 no . . .
H(13) C(10) H(15) 109.5 no . . .
H(14) C(10) H(15) 109.5 no . . .
C(11) C(16) H(16) 110.1 no . . .
C(11) C(16) H(17) 109.5 no . . .
C(11) C(16) H(18) 108.7 no . . .
H(16) C(16) H(17) 109.5 no . . .
H(16) C(16) H(18) 109.5 no . . .
H(17) C(16) H(18) 109.5 no . . .
C(12) C(17) H(19) 110.3 no . . .
C(12) C(17) H(20) 108.8 no . . .
C(12) C(17) H(21) 109.2 no . . .
H(19) C(17) H(20) 109.5 no . . .
H(19) C(17) H(21) 109.5 no . . .
H(20) C(17) H(21) 109.5 no . . .
C(13) C(18) H(22) 109.9 no . . .
C(13) C(18) H(23) 109.9 no . . .
C(13) C(18) H(24) 108.6 no . . .
H(22) C(18) H(23) 109.5 no . . .
H(22) C(18) H(24) 109.5 no . . .
H(23) C(18) H(24) 109.5 no . . .
C(14) C(19) H(25) 109.0 no . . .
C(14) C(19) H(26) 109.3 no . . .
C(14) C(19) H(27) 110.2 no . . .
H(25) C(19) H(26) 109.5 no . . .
H(25) C(19) H(27) 109.5 no . . .
H(26) C(19) H(27) 109.5 no . . .
C(15) C(20) H(28) 111.1 no . . .
C(15) C(20) H(29) 108.3 no . . .
C(15) C(20) H(30) 109.0 no . . .
H(28) C(20) H(29) 109.5 no . . .
H(28) C(20) H(30) 109.5 no . . .
H(29) C(20) H(30) 109.5 no . . .
P(1) C(21) H(31) 110.4 no . . .
P(1) C(21) H(32) 109.1 no . . .
P(1) C(21) H(33) 108.8 no . . .
H(31) C(21) H(32) 109.5 no . . .
H(31) C(21) H(33) 109.5 no . . .
H(32) C(21) H(33) 109.5 no . . .
P(1) C(22) H(34) 108.9 no . . .
P(1) C(22) H(35) 109.3 no . . .
P(1) C(22) H(36) 110.2 no . . .
H(34) C(22) H(35) 109.5 no . . .
H(34) C(22) H(36) 109.5 no . . .
H(35) C(22) H(36) 109.5 no . . .
P(1) C(23) H(37) 108.8 no . . .
P(1) C(23) H(38) 108.5 no . . .
P(2) C(23) H(37) 108.5 no . . .
P(2) C(23) H(38) 108.4 no . . .
H(37) C(23) H(38) 109.5 no . . .
P(2) C(24) H(39) 110.0 no . . .
P(2) C(24) H(40) 109.0 no . . .
P(2) C(24) H(41) 109.4 no . . .
H(39) C(24) H(40) 109.5 no . . .
H(39) C(24) H(41) 109.5 no . . .
H(40) C(24) H(41) 109.5 no . . .
P(2) C(25) H(42) 109.8 no . . .
P(2) C(25) H(43) 109.1 no . . .
P(2) C(25) H(44) 109.5 no . . .
H(42) C(25) H(43) 109.5 no . . .
H(42) C(25) H(44) 109.5 no . . .
H(43) C(25) H(44) 109.5 no . . .
