# Supplementary material
Source: MDPI journal article supplement (https://www.mdpi.com/2304-6740/7/10/121)
Supplement: s1 [file s1 › X-ray data of 5.cif]

#==============================================================================

data_5

_publ_author_name    Ken-ichi Fujita

#==============================================================================

# CHEMICAL DATA

_chemical_formula_sum                  'C28 H47 F3 Ir2 O3 P2 S '
_chemical_formula_moiety               'C28 H47 F3 Ir2 O3 P2 S '
_chemical_formula_weight               967.12
_chemical_melting_point                ?

#==============================================================================

# CRYSTAL DATA
_symmetry_cell_setting                 monoclinic
_symmetry_space_group_name_H-M        'P 1 21/c 1'
_symmetry_space_group_name_Hall       '-P 2ybc'
_symmetry_Int_Tables_number            14
loop_
_symmetry_equiv_pos_site_id
_symmetry_equiv_pos_as_xyz
1   '+X,+Y,+Z'
2   '-X,1/2+Y,1/2-Z'
3   '-X,-Y,-Z'
4   '+X,1/2-Y,1/2+Z'

#------------------------------------------------------------------------------

_cell_length_a                         10.63646(19)
_cell_length_b                         19.4945(4)
_cell_length_c                         15.9469(3)
_cell_angle_alpha                      90.0000
_cell_angle_beta                       102.8964(7)
_cell_angle_gamma                      90.0000
_cell_volume                           3223.22(10)
_cell_formula_units_Z                  4
_cell_measurement_reflns_used          29404
_cell_measurement_theta_min            3.1
_cell_measurement_theta_max            27.5
_cell_measurement_temperature          173.1

#------------------------------------------------------------------------------

_exptl_crystal_description            'block'
_exptl_crystal_colour                 'orange'
_exptl_crystal_size_max                0.35
_exptl_crystal_size_mid                0.30
_exptl_crystal_size_min                0.20
_exptl_crystal_density_diffrn          1.993
_exptl_crystal_density_meas            ?
_exptl_crystal_density_method         'not measured'
_exptl_crystal_F_000                   1864.00
_exptl_absorpt_coefficient_mu          8.481
_exptl_absorpt_correction_type         multi-scan
_exptl_absorpt_process_details         
;
    Higashi, T. (1995). Program for Absorption Correction.
    Rigaku Corporation, Tokyo, Japan.
;
_exptl_absorpt_correction_T_min        0.060
_exptl_absorpt_correction_T_max        0.183

#==============================================================================

# EXPERIMENTAL DATA

_diffrn_ambient_temperature      173.1
_diffrn_radiation_type                'Mo K\a'
_diffrn_radiation_wavelength           0.71075
_diffrn_measurement_device_type       'Rigaku RAXIS-RAPID'
_diffrn_measurement_method             \w
_diffrn_detector_area_resol_mean       10.00
_diffrn_reflns_number                  31455
_diffrn_reflns_av_R_equivalents        0.063
_diffrn_reflns_theta_max               27.48
_diffrn_measured_fraction_theta_max    0.998
_diffrn_reflns_theta_full              27.48
_diffrn_measured_fraction_theta_full   0.998
_diffrn_reflns_limit_h_min             -13
_diffrn_reflns_limit_h_max             13
_diffrn_reflns_limit_k_min             -25
_diffrn_reflns_limit_k_max             25
_diffrn_reflns_limit_l_min             -20
_diffrn_reflns_limit_l_max             18

#==============================================================================

# REFINEMENT DATA

_refine_special_details
;
    Refinement was performed using reflections with F^2^ > 2.0 sigma(F^2^).
    The weighted R-factor(wR), goodness of fit (S) and R-factor (gt) are 
    based on F, with F set to zero for negative F. The threshold expression of
    F^2^ > 2.0 sigma(F^2^) is used only for calculating R-factor (gt).
;
_reflns_number_total                   7380
_reflns_number_gt                      6781
_reflns_threshold_expression           F^2^>2.0\s(F^2^)
_refine_ls_structure_factor_coef       F
_refine_ls_R_factor_gt                 0.0314
_refine_ls_wR_factor_ref               0.0453
_refine_ls_hydrogen_treatment          refall
_refine_ls_number_reflns               6798
_refine_ls_number_parameters           399
_refine_ls_goodness_of_fit_ref         1.007
_refine_ls_weighting_scheme            calc
_refine_ls_weighting_details
'w = 1/[0.0002Fo^2^ + 1.0000\s(Fo^2^)]'
_refine_ls_shift/su_max                0.0000
_refine_diff_density_max               2.46
_refine_diff_density_min               -1.25
_refine_ls_extinction_method           none
_refine_ls_extinction_coef             ?

loop_
_atom_type_symbol
_atom_type_description
_atom_type_scat_dispersion_real
_atom_type_scat_dispersion_imag
_atom_type_scat_source
  'C' 'C'  0.003 0.002 
;
International Tables for Crystallography
(1992, Vol. C, Tables 4.2.6.8 and 6.1.1.4)
;
  'H' 'H'  0.000 0.000 
;
International Tables for Crystallography
(1992, Vol. C, Table 6.1.1.4)
;
  'Ir' 'Ir'  -1.444 7.990 
;
International Tables for Crystallography
(1992, Vol. C, Tables 4.2.6.8 and 6.1.1.4)
;
  'P' 'P'  0.102 0.094 
;
International Tables for Crystallography
(1992, Vol. C, Tables 4.2.6.8 and 6.1.1.4)
;
  'S' 'S'  0.125 0.123 
;
International Tables for Crystallography
(1992, Vol. C, Tables 4.2.6.8 and 6.1.1.4)
;
  'O' 'O'  0.011 0.006 
;
International Tables for Crystallography
(1992, Vol. C, Tables 4.2.6.8 and 6.1.1.4)
;
  'F' 'F'  0.017 0.010 
;
International Tables for Crystallography
(1992, Vol. C, Tables 4.2.6.8 and 6.1.1.4)
;

#==============================================================================

# ATOMIC COORDINATES AND THERMAL PARAMETERS

loop_
_atom_site_label
_atom_site_type_symbol
_atom_site_fract_x
_atom_site_fract_y
_atom_site_fract_z
_atom_site_U_iso_or_equiv
_atom_site_adp_type
_atom_site_occupancy
_atom_site_symmetry_multiplicity
_atom_site_calc_flag
_atom_site_refinement_flags
_atom_site_disorder_assembly
_atom_site_disorder_group
 Ir(1) Ir 0.413080(10) 0.305750(10) 0.463380(10) 0.01742(5) Uani 1.00 1 d . . .
 Ir(2) Ir 0.188360(10) 0.218260(10) 0.464510(10) 0.01593(5) Uani 1.00 1 d . . .
 S(1) S 0.73346(12) 0.04174(8) 0.67702(8) 0.0344(3) Uani 1.00 1 d . . .
 P(1) P 0.54148(11) 0.21442(6) 0.45987(9) 0.0240(3) Uani 1.00 1 d . . .
 P(2) P 0.34694(11) 0.15305(6) 0.54326(8) 0.0211(2) Uani 1.00 1 d . . .
 F(1) F 0.9827(2) 0.03700(17) 0.7444(2) 0.0452(9) Uani 1.00 1 d . . .
 F(2) F 0.8896(3) -0.06158(16) 0.7284(2) 0.0567(11) Uani 1.00 1 d . . .
 F(3) F 0.8667(2) 0.00525(16) 0.83112(18) 0.0411(8) Uani 1.00 1 d . . .
 O(1) O 0.6327(3) -0.0058(3) 0.6832(3) 0.0743(16) Uani 1.00 1 d . . .
 O(2) O 0.7253(4) 0.1087(2) 0.7139(2) 0.0640(14) Uani 1.00 1 d . . .
 O(3) O 0.7686(3) 0.0424(2) 0.5955(2) 0.0480(12) Uani 1.00 1 d . . .
 C(1) C 0.4359(4) 0.4110(2) 0.4182(2) 0.0271(12) Uani 1.00 1 d . . .
 C(2) C 0.5582(4) 0.3872(2) 0.4663(3) 0.0267(12) Uani 1.00 1 d . . .
 C(3) C 0.5473(4) 0.3776(2) 0.5536(3) 0.0254(11) Uani 1.00 1 d . . .
 C(4) C 0.4218(4) 0.3940(2) 0.5581(3) 0.0224(11) Uani 1.00 1 d . . .
 C(5) C 0.3512(4) 0.4151(2) 0.4745(3) 0.0258(12) Uani 1.00 1 d . . .
 C(6) C 0.4087(5) 0.4354(2) 0.3252(3) 0.0415(15) Uani 1.00 1 d . . .
 C(7) C 0.6784(4) 0.3841(2) 0.4299(3) 0.0398(15) Uani 1.00 1 d . . .
 C(8) C 0.6564(4) 0.3635(2) 0.6303(3) 0.0372(14) Uani 1.00 1 d . . .
 C(9) C 0.3744(4) 0.3950(2) 0.6395(3) 0.0303(13) Uani 1.00 1 d . . .
 C(10) C 0.2219(4) 0.4481(3) 0.4519(3) 0.0392(15) Uani 1.00 1 d . . .
 C(11) C 0.0388(3) 0.2743(2) 0.5225(3) 0.0211(11) Uani 1.00 1 d . . .
 C(12) C 0.0478(4) 0.2045(2) 0.5485(3) 0.0227(11) Uani 1.00 1 d . . .
 C(13) C 0.0080(3) 0.1619(2) 0.4712(3) 0.0225(11) Uani 1.00 1 d . . .
 C(14) C -0.0220(4) 0.2081(2) 0.3996(3) 0.0227(11) Uani 1.00 1 d . . .
 C(15) C -0.0009(4) 0.2774(2) 0.4316(3) 0.0219(11) Uani 1.00 1 d . . .
 C(16) C 0.0442(4) 0.3336(2) 0.5858(3) 0.0326(13) Uani 1.00 1 d . . .
 C(17) C 0.0671(4) 0.1796(2) 0.6401(3) 0.0323(13) Uani 1.00 1 d . . .
 C(18) C -0.0189(4) 0.0866(2) 0.4665(3) 0.0377(15) Uani 1.00 1 d . . .
 C(19) C -0.0769(4) 0.1879(3) 0.3086(3) 0.0359(14) Uani 1.00 1 d . . .
 C(20) C -0.0369(4) 0.3393(2) 0.3754(3) 0.0294(13) Uani 1.00 1 d . . .
 C(21) C 0.5795(5) 0.1968(3) 0.3563(3) 0.0400(16) Uani 1.00 1 d . . .
 C(22) C 0.7027(4) 0.2148(2) 0.5284(3) 0.0374(15) Uani 1.00 1 d . . .
 C(23) C 0.4782(3) 0.1328(2) 0.4922(3) 0.0236(11) Uani 1.00 1 d . . .
 C(24) C 0.3080(4) 0.0661(2) 0.5717(3) 0.0331(13) Uani 1.00 1 d . . .
 C(25) C 0.4262(4) 0.1879(2) 0.6463(3) 0.0303(13) Uani 1.00 1 d . . .
 C(26) C 0.2747(3) 0.2669(2) 0.3704(2) 0.0206(10) Uani 1.00 1 d . . .
 C(27) C 0.2493(4) 0.1977(2) 0.3475(2) 0.0209(11) Uani 1.00 1 d . . .
 C(28) C 0.8739(4) 0.0036(2) 0.7485(3) 0.0294(13) Uani 1.00 1 d . . .
 H(1) H 0.4847 0.4310 0.3037 0.050 Uiso 1.00 1 c R . .
 H(2) H 0.3826 0.4821 0.3226 0.050 Uiso 1.00 1 c R . .
 H(3) H 0.3420 0.4083 0.2915 0.050 Uiso 1.00 1 c R . .
 H(4) H 0.7486 0.3674 0.4727 0.050 Uiso 1.00 1 c R . .
 H(5) H 0.6981 0.4287 0.4127 0.049 Uiso 1.00 1 c R . .
 H(6) H 0.6636 0.3542 0.3816 0.050 Uiso 1.00 1 c R . .
 H(7) H 0.6237 0.3618 0.6811 0.044 Uiso 1.00 1 c R . .
 H(8) H 0.7189 0.3990 0.6355 0.044 Uiso 1.00 1 c R . .
 H(9) H 0.6954 0.3207 0.6227 0.044 Uiso 1.00 1 c R . .
 H(10) H 0.2872 0.4099 0.6276 0.038 Uiso 1.00 1 c R . .
 H(11) H 0.4258 0.4255 0.6794 0.037 Uiso 1.00 1 c R . .
 H(12) H 0.3800 0.3501 0.6634 0.037 Uiso 1.00 1 c R . .
 H(13) H 0.2055 0.4638 0.3941 0.047 Uiso 1.00 1 c R . .
 H(14) H 0.2198 0.4860 0.4892 0.047 Uiso 1.00 1 c R . .
 H(15) H 0.1578 0.4158 0.4581 0.047 Uiso 1.00 1 c R . .
 H(16) H 0.0589 0.3160 0.6428 0.039 Uiso 1.00 1 c R . .
 H(17) H -0.0352 0.3578 0.5730 0.039 Uiso 1.00 1 c R . .
 H(18) H 0.1124 0.3637 0.5811 0.039 Uiso 1.00 1 c R . .
 H(19) H 0.0565 0.1312 0.6404 0.040 Uiso 1.00 1 c R . .
 H(20) H 0.0055 0.2007 0.6667 0.041 Uiso 1.00 1 c R . .
 H(21) H 0.1515 0.1912 0.6710 0.040 Uiso 1.00 1 c R . .
 H(22) H -0.0514 0.0737 0.4082 0.047 Uiso 1.00 1 c R . .
 H(23) H -0.0809 0.0761 0.4991 0.047 Uiso 1.00 1 c R . .
 H(24) H 0.0585 0.0622 0.4891 0.047 Uiso 1.00 1 c R . .
 H(25) H -0.0902 0.2277 0.2734 0.043 Uiso 1.00 1 c R . .
 H(26) H -0.1569 0.1651 0.3050 0.043 Uiso 1.00 1 c R . .
 H(27) H -0.0186 0.1580 0.2895 0.043 Uiso 1.00 1 c R . .
 H(28) H -0.0168 0.3797 0.4092 0.036 Uiso 1.00 1 c R . .
 H(29) H -0.1267 0.3383 0.3503 0.036 Uiso 1.00 1 c R . .
 H(30) H 0.0101 0.3392 0.3313 0.036 Uiso 1.00 1 c R . .
 H(31) H 0.5165 0.1667 0.3241 0.052 Uiso 1.00 1 c R . .
 H(32) H 0.6622 0.1760 0.3650 0.052 Uiso 1.00 1 c R . .
 H(33) H 0.5797 0.2386 0.3255 0.051 Uiso 1.00 1 c R . .
 H(34) H 0.7612 0.2347 0.4983 0.045 Uiso 1.00 1 c R . .
 H(35) H 0.7285 0.1691 0.5442 0.045 Uiso 1.00 1 c R . .
 H(36) H 0.7028 0.2409 0.5788 0.045 Uiso 1.00 1 c R . .
 H(37) H 0.4476 0.1050 0.4430 0.027 Uiso 1.00 1 c R . .
 H(38) H 0.5442 0.1092 0.5315 0.028 Uiso 1.00 1 c R . .
 H(39) H 0.2822 0.0670 0.6250 0.041 Uiso 1.00 1 c R . .
 H(40) H 0.3818 0.0377 0.5767 0.041 Uiso 1.00 1 c R . .
 H(41) H 0.2397 0.0485 0.5282 0.041 Uiso 1.00 1 c R . .
 H(42) H 0.4977 0.2149 0.6398 0.035 Uiso 1.00 1 c R . .
 H(43) H 0.4554 0.1515 0.6853 0.035 Uiso 1.00 1 c R . .
 H(44) H 0.3672 0.2157 0.6679 0.035 Uiso 1.00 1 c R . .
 H(45) H 0.2221 0.2995 0.3345 0.025 Uiso 1.00 1 c R . .
 H(46) H 0.3207 0.1679 0.3500 0.025 Uiso 1.00 1 c R . .
 H(47) H 0.1849 0.1880 0.2972 0.025 Uiso 1.00 1 c R . .


loop_
_atom_site_aniso_label
_atom_site_aniso_U_11
_atom_site_aniso_U_22
_atom_site_aniso_U_33
_atom_site_aniso_U_12
_atom_site_aniso_U_13
_atom_site_aniso_U_23
 Ir(1) 0.01872(11) 0.01863(12) 0.01552(12) -0.00154(6) 0.00509(8) -0.00047(6)
 Ir(2) 0.01778(11) 0.01670(12) 0.01347(11) -0.00045(6) 0.00383(7) 0.00073(6)
 S(1) 0.0338(6) 0.0441(8) 0.0238(6) 0.0031(5) 0.0034(5) -0.0004(5)
 P(1) 0.0215(5) 0.0255(6) 0.0264(7) 0.0013(4) 0.0084(5) -0.0011(5)
 P(2) 0.0236(5) 0.0200(5) 0.0189(6) 0.0009(4) 0.0030(4) 0.0031(4)
 F(1) 0.0313(14) 0.050(2) 0.054(2) -0.0098(14) 0.0092(14) -0.0017(17)
 F(2) 0.083(2) 0.0218(17) 0.062(2) 0.0049(16) 0.0091(19) -0.0083(15)
 F(3) 0.0494(16) 0.0443(18) 0.0272(16) 0.0003(14) 0.0030(13) 0.0069(14)
 O(1) 0.037(2) 0.117(4) 0.061(3) -0.028(2) -0.005(2) 0.014(3)
 O(2) 0.077(2) 0.066(3) 0.039(2) 0.045(2) -0.008(2) -0.014(2)
 O(3) 0.072(2) 0.051(2) 0.0230(19) 0.002(2) 0.0136(18) -0.0018(18)
 C(1) 0.040(2) 0.023(2) 0.019(2) -0.009(2) 0.0080(19) 0.0017(19)
 C(2) 0.034(2) 0.023(2) 0.027(2) -0.0131(19) 0.014(2) -0.007(2)
 C(3) 0.024(2) 0.025(2) 0.024(2) -0.0068(18) 0.0005(18) -0.0043(19)
 C(4) 0.025(2) 0.019(2) 0.023(2) -0.0028(17) 0.0044(18) -0.0040(18)
 C(5) 0.031(2) 0.017(2) 0.028(2) -0.0038(18) 0.0047(19) 0.0003(19)
 C(6) 0.064(3) 0.028(2) 0.032(3) 0.001(2) 0.011(2) 0.008(2)
 C(7) 0.037(2) 0.041(3) 0.046(3) -0.010(2) 0.020(2) -0.006(2)
 C(8) 0.035(2) 0.037(3) 0.037(3) -0.006(2) 0.003(2) -0.005(2)
 C(9) 0.033(2) 0.034(2) 0.026(2) -0.002(2) 0.011(2) -0.006(2)
 C(10) 0.039(2) 0.038(3) 0.039(3) 0.004(2) 0.005(2) -0.000(2)
 C(11) 0.018(2) 0.023(2) 0.025(2) 0.0004(17) 0.0097(18) 0.0000(18)
 C(12) 0.021(2) 0.029(2) 0.021(2) 0.0025(18) 0.0094(18) 0.0049(19)
 C(13) 0.0166(19) 0.025(2) 0.028(2) -0.0035(17) 0.0098(17) 0.0027(19)
 C(14) 0.018(2) 0.032(2) 0.017(2) -0.0016(18) 0.0016(17) 0.0004(19)
 C(15) 0.018(2) 0.025(2) 0.024(2) 0.0066(17) 0.0079(18) 0.0033(18)
 C(16) 0.032(2) 0.033(2) 0.033(2) 0.001(2) 0.008(2) -0.008(2)
 C(17) 0.035(2) 0.043(3) 0.023(2) -0.001(2) 0.014(2) 0.001(2)
 C(18) 0.038(2) 0.028(2) 0.051(3) -0.010(2) 0.019(2) -0.007(2)
 C(19) 0.019(2) 0.063(3) 0.025(2) 0.001(2) 0.0026(19) -0.002(2)
 C(20) 0.030(2) 0.031(2) 0.028(2) 0.006(2) 0.009(2) 0.008(2)
 C(21) 0.047(3) 0.046(3) 0.036(3) 0.004(2) 0.027(2) -0.003(2)
 C(22) 0.023(2) 0.040(3) 0.049(3) 0.006(2) 0.007(2) -0.004(2)
 C(23) 0.023(2) 0.024(2) 0.022(2) 0.0081(18) 0.0010(18) -0.0001(19)
 C(24) 0.035(2) 0.028(2) 0.040(3) 0.004(2) 0.014(2) 0.008(2)
 C(25) 0.034(2) 0.031(2) 0.022(2) 0.005(2) -0.002(2) 0.003(2)
 C(26) 0.022(2) 0.026(2) 0.014(2) -0.0028(18) 0.0048(16) 0.0028(18)
 C(27) 0.026(2) 0.025(2) 0.013(2) -0.0007(17) 0.0060(17) -0.0029(17)
 C(28) 0.033(2) 0.019(2) 0.035(3) -0.0018(19) 0.006(2) 0.001(2)

#==============================================================================

_computing_data_collection            'PROCESS-AUTO'
_computing_cell_refinement            'PROCESS-AUTO'
_computing_data_reduction             'CrystalStructure'
_computing_structure_solution         'DIRDIF99 (PATTY)'
_computing_structure_refinement       'CRYSTALS'
_computing_publication_material       'CrystalStructure 3.8'
_computing_molecular_graphics          ?

#==============================================================================

# MOLECULAR GEOMETRY

_geom_special_details
;
    ENTER SPECIAL DETAILS OF THE MOLECULAR GEOMETRY
;

loop_
_geom_bond_atom_site_label_1
_geom_bond_atom_site_label_2
_geom_bond_distance
_geom_bond_publ_flag
_geom_bond_site_symmetry_1
_geom_bond_site_symmetry_2
Ir(1) Ir(2) 2.9397(2) yes . .
Ir(1) P(1) 2.2522(12) yes . .
Ir(1) C(1) 2.205(4) yes . .
Ir(1) C(2) 2.207(4) yes . .
Ir(1) C(3) 2.270(4) yes . .
Ir(1) C(4) 2.278(4) yes . .
Ir(1) C(5) 2.250(4) yes . .
Ir(1) C(26) 1.991(3) yes . .
Ir(2) P(2) 2.2567(11) yes . .
Ir(2) C(11) 2.289(4) yes . .
Ir(2) C(12) 2.235(5) yes . .
Ir(2) C(13) 2.233(4) yes . .
Ir(2) C(14) 2.255(3) yes . .
Ir(2) C(15) 2.278(4) yes . .
Ir(2) C(26) 2.147(4) yes . .
Ir(2) C(27) 2.146(4) yes . .
S(1) O(1) 1.437(5) yes . .
S(1) O(2) 1.442(4) yes . .
S(1) O(3) 1.430(4) yes . .
S(1) C(28) 1.824(4) yes . .
P(1) C(21) 1.819(6) yes . .
P(1) C(22) 1.816(4) yes . .
P(1) C(23) 1.845(4) yes . .
P(2) C(23) 1.809(4) yes . .
P(2) C(24) 1.826(5) yes . .
P(2) C(25) 1.803(4) yes . .
F(1) C(28) 1.342(5) yes . .
F(2) C(28) 1.330(5) yes . .
F(3) C(28) 1.337(5) yes . .
C(1) C(2) 1.432(6) yes . .
C(1) C(5) 1.409(7) yes . .
C(1) C(6) 1.522(7) yes . .
C(2) C(3) 1.435(7) yes . .
C(2) C(7) 1.518(7) yes . .
C(3) C(4) 1.390(6) yes . .
C(3) C(8) 1.513(6) yes . .
C(4) C(5) 1.437(6) yes . .
C(4) C(9) 1.495(7) yes . .
C(5) C(10) 1.488(6) yes . .
C(11) C(12) 1.419(6) yes . .
C(11) C(15) 1.419(6) yes . .
C(11) C(16) 1.527(7) yes . .
C(12) C(13) 1.468(6) yes . .
C(12) C(17) 1.509(6) yes . .
C(13) C(14) 1.433(6) yes . .
C(13) C(18) 1.494(6) yes . .
C(14) C(15) 1.444(6) yes . .
C(14) C(19) 1.491(6) yes . .
C(15) C(20) 1.500(6) yes . .
C(26) C(27) 1.408(6) yes . .
C(6) H(1) 0.950 no . .
C(6) H(2) 0.950 no . .
C(6) H(3) 0.950 no . .
C(7) H(4) 0.950 no . .
C(7) H(5) 0.950 no . .
C(7) H(6) 0.950 no . .
C(8) H(7) 0.950 no . .
C(8) H(8) 0.950 no . .
C(8) H(9) 0.950 no . .
C(9) H(10) 0.950 no . .
C(9) H(11) 0.950 no . .
C(9) H(12) 0.950 no . .
C(10) H(13) 0.950 no . .
C(10) H(14) 0.950 no . .
C(10) H(15) 0.950 no . .
C(16) H(16) 0.950 no . .
C(16) H(17) 0.950 no . .
C(16) H(18) 0.950 no . .
C(17) H(19) 0.950 no . .
C(17) H(20) 0.950 no . .
C(17) H(21) 0.950 no . .
C(18) H(22) 0.950 no . .
C(18) H(23) 0.950 no . .
C(18) H(24) 0.950 no . .
C(19) H(25) 0.950 no . .
C(19) H(26) 0.950 no . .
C(19) H(27) 0.950 no . .
C(20) H(28) 0.950 no . .
C(20) H(29) 0.950 no . .
C(20) H(30) 0.950 no . .
C(21) H(31) 0.950 no . .
C(21) H(32) 0.950 no . .
C(21) H(33) 0.950 no . .
C(22) H(34) 0.950 no . .
C(22) H(35) 0.950 no . .
C(22) H(36) 0.950 no . .
C(23) H(37) 0.950 no . .
C(23) H(38) 0.950 no . .
C(24) H(39) 0.950 no . .
C(24) H(40) 0.950 no . .
C(24) H(41) 0.950 no . .
C(25) H(42) 0.950 no . .
C(25) H(43) 0.950 no . .
C(25) H(44) 0.950 no . .
C(26) H(45) 0.950 no . .
C(27) H(46) 0.950 no . .
C(27) H(47) 0.950 no . .

loop_
_geom_angle_atom_site_label_1
_geom_angle_atom_site_label_2
_geom_angle_atom_site_label_3
_geom_angle
_geom_angle_publ_flag
_geom_angle_site_symmetry_1
_geom_angle_site_symmetry_2
_geom_angle_site_symmetry_3
Ir(2) Ir(1) P(1) 92.29(3) yes . . .
Ir(2) Ir(1) C(1) 133.66(11) yes . . .
Ir(2) Ir(1) C(2) 169.37(12) yes . . .
Ir(2) Ir(1) C(3) 138.71(13) yes . . .
Ir(2) Ir(1) C(4) 110.30(11) yes . . .
Ir(2) Ir(1) C(5) 107.26(11) yes . . .
Ir(2) Ir(1) C(26) 46.91(13) yes . . .
P(1) Ir(1) C(1) 128.00(13) yes . . .
P(1) Ir(1) C(2) 98.27(12) yes . . .
P(1) Ir(1) C(3) 101.80(11) yes . . .
P(1) Ir(1) C(4) 132.72(10) yes . . .
P(1) Ir(1) C(5) 160.18(11) yes . . .
P(1) Ir(1) C(26) 91.87(13) yes . . .
C(1) Ir(1) C(2) 37.88(16) yes . . .
C(1) Ir(1) C(3) 62.20(16) yes . . .
C(1) Ir(1) C(4) 61.52(17) yes . . .
C(1) Ir(1) C(5) 36.86(18) yes . . .
C(1) Ir(1) C(26) 103.14(17) yes . . .
C(2) Ir(1) C(3) 37.36(18) yes . . .
C(2) Ir(1) C(4) 61.21(17) yes . . .
C(2) Ir(1) C(5) 62.14(17) yes . . .
C(2) Ir(1) C(26) 133.34(18) yes . . .
C(3) Ir(1) C(4) 35.60(16) yes . . .
C(3) Ir(1) C(5) 61.25(15) yes . . .
C(3) Ir(1) C(26) 164.24(17) yes . . .
C(4) Ir(1) C(5) 36.99(15) yes . . .
C(4) Ir(1) C(26) 134.02(16) yes . . .
C(5) Ir(1) C(26) 103.79(16) yes . . .
Ir(1) Ir(2) P(2) 79.77(3) yes . . .
Ir(1) Ir(2) C(11) 111.42(10) yes . . .
Ir(1) Ir(2) C(12) 136.61(11) yes . . .
Ir(1) Ir(2) C(13) 173.60(11) yes . . .
Ir(1) Ir(2) C(14) 140.63(12) yes . . .
Ir(1) Ir(2) C(15) 112.51(11) yes . . .
Ir(1) Ir(2) C(26) 42.63(10) yes . . .
Ir(1) Ir(2) C(27) 72.49(11) yes . . .
P(2) Ir(2) C(11) 122.99(11) yes . . .
P(2) Ir(2) C(12) 96.66(11) yes . . .
P(2) Ir(2) C(13) 103.86(11) yes . . .
P(2) Ir(2) C(14) 138.42(12) yes . . .
P(2) Ir(2) C(15) 157.83(13) yes . . .
P(2) Ir(2) C(26) 104.76(11) yes . . .
P(2) Ir(2) C(27) 92.61(11) yes . . .
C(11) Ir(2) C(12) 36.53(17) yes . . .
C(11) Ir(2) C(13) 62.19(16) yes . . .
C(11) Ir(2) C(14) 61.27(16) yes . . .
C(11) Ir(2) C(15) 36.21(16) yes . . .
C(11) Ir(2) C(26) 121.07(16) yes . . .
C(11) Ir(2) C(27) 144.39(15) yes . . .
C(12) Ir(2) C(13) 38.37(16) yes . . .
C(12) Ir(2) C(14) 62.40(16) yes . . .
C(12) Ir(2) C(15) 61.56(17) yes . . .
C(12) Ir(2) C(26) 156.84(16) yes . . .
C(12) Ir(2) C(27) 150.61(16) yes . . .
C(13) Ir(2) C(14) 37.24(16) yes . . .
C(13) Ir(2) C(15) 62.33(15) yes . . .
C(13) Ir(2) C(26) 139.15(15) yes . . .
C(13) Ir(2) C(27) 112.28(16) yes . . .
C(14) Ir(2) C(15) 37.15(16) yes . . .
C(14) Ir(2) C(26) 104.66(16) yes . . .
C(14) Ir(2) C(27) 92.62(16) yes . . .
C(15) Ir(2) C(26) 96.25(16) yes . . .
C(15) Ir(2) C(27) 108.48(16) yes . . .
C(26) Ir(2) C(27) 38.30(17) yes . . .
O(1) S(1) O(2) 116.2(3) yes . . .
O(1) S(1) O(3) 114.7(2) yes . . .
O(1) S(1) C(28) 102.3(2) yes . . .
O(2) S(1) O(3) 114.5(2) yes . . .
O(2) S(1) C(28) 103.3(2) yes . . .
O(3) S(1) C(28) 103.2(2) yes . . .
Ir(1) P(1) C(21) 115.49(18) yes . . .
Ir(1) P(1) C(22) 118.56(18) yes . . .
Ir(1) P(1) C(23) 114.41(15) yes . . .
C(21) P(1) C(22) 100.2(2) yes . . .
C(21) P(1) C(23) 105.1(2) yes . . .
C(22) P(1) C(23) 100.9(2) yes . . .
Ir(2) P(2) C(23) 115.34(15) yes . . .
Ir(2) P(2) C(24) 118.57(15) yes . . .
Ir(2) P(2) C(25) 115.73(16) yes . . .
C(23) P(2) C(24) 98.6(2) yes . . .
C(23) P(2) C(25) 104.0(2) yes . . .
C(24) P(2) C(25) 102.1(2) yes . . .
Ir(1) C(1) C(2) 71.1(2) yes . . .
Ir(1) C(1) C(5) 73.3(2) yes . . .
Ir(1) C(1) C(6) 126.8(3) yes . . .
C(2) C(1) C(5) 108.1(4) yes . . .
C(2) C(1) C(6) 125.1(4) yes . . .
C(5) C(1) C(6) 126.4(4) yes . . .
Ir(1) C(2) C(1) 71.0(2) yes . . .
Ir(1) C(2) C(3) 73.7(2) yes . . .
Ir(1) C(2) C(7) 127.4(3) yes . . .
C(1) C(2) C(3) 107.5(4) yes . . .
C(1) C(2) C(7) 123.4(4) yes . . .
C(3) C(2) C(7) 128.5(3) yes . . .
Ir(1) C(3) C(2) 69.0(2) yes . . .
Ir(1) C(3) C(4) 72.5(2) yes . . .
Ir(1) C(3) C(8) 131.4(3) yes . . .
C(2) C(3) C(4) 107.9(3) yes . . .
C(2) C(3) C(8) 126.5(4) yes . . .
C(4) C(3) C(8) 124.9(4) yes . . .
Ir(1) C(4) C(3) 71.9(2) yes . . .
Ir(1) C(4) C(5) 70.5(2) yes . . .
Ir(1) C(4) C(9) 127.9(3) yes . . .
C(3) C(4) C(5) 109.1(4) yes . . .
C(3) C(4) C(9) 124.2(3) yes . . .
C(5) C(4) C(9) 126.5(3) yes . . .
Ir(1) C(5) C(1) 69.8(2) yes . . .
Ir(1) C(5) C(4) 72.5(2) yes . . .
Ir(1) C(5) C(10) 131.4(3) yes . . .
C(1) C(5) C(4) 107.4(3) yes . . .
C(1) C(5) C(10) 123.9(4) yes . . .
C(4) C(5) C(10) 127.7(4) yes . . .
Ir(2) C(11) C(12) 69.7(2) yes . . .
Ir(2) C(11) C(15) 71.5(2) yes . . .
Ir(2) C(11) C(16) 134.5(2) yes . . .
C(12) C(11) C(15) 109.0(3) yes . . .
C(12) C(11) C(16) 122.8(4) yes . . .
C(15) C(11) C(16) 127.0(4) yes . . .
Ir(2) C(12) C(11) 73.8(2) yes . . .
Ir(2) C(12) C(13) 70.7(2) yes . . .
Ir(2) C(12) C(17) 130.8(3) yes . . .
C(11) C(12) C(13) 108.0(3) yes . . .
C(11) C(12) C(17) 125.2(4) yes . . .
C(13) C(12) C(17) 125.6(4) yes . . .
Ir(2) C(13) C(12) 70.9(2) yes . . .
Ir(2) C(13) C(14) 72.2(2) yes . . .
Ir(2) C(13) C(18) 129.6(3) yes . . .
C(12) C(13) C(14) 106.5(3) yes . . .
C(12) C(13) C(18) 127.9(4) yes . . .
C(14) C(13) C(18) 124.8(4) yes . . .
Ir(2) C(14) C(13) 70.6(2) yes . . .
Ir(2) C(14) C(15) 72.3(2) yes . . .
Ir(2) C(14) C(19) 127.1(3) yes . . .
C(13) C(14) C(15) 108.5(3) yes . . .
C(13) C(14) C(19) 125.4(4) yes . . .
C(15) C(14) C(19) 125.9(4) yes . . .
Ir(2) C(15) C(11) 72.3(2) yes . . .
Ir(2) C(15) C(14) 70.6(2) yes . . .
Ir(2) C(15) C(20) 129.7(3) yes . . .
C(11) C(15) C(14) 107.9(3) yes . . .
C(11) C(15) C(20) 128.5(4) yes . . .
C(14) C(15) C(20) 122.9(4) yes . . .
P(1) C(23) P(2) 107.7(2) yes . . .
Ir(1) C(26) Ir(2) 90.46(17) yes . . .
Ir(1) C(26) C(27) 128.7(3) yes . . .
Ir(2) C(26) C(27) 70.8(2) yes . . .
Ir(2) C(27) C(26) 70.9(2) yes . . .
S(1) C(28) F(1) 111.5(3) yes . . .
S(1) C(28) F(2) 111.6(3) yes . . .
S(1) C(28) F(3) 112.8(3) yes . . .
F(1) C(28) F(2) 107.2(4) yes . . .
F(1) C(28) F(3) 106.0(3) yes . . .
F(2) C(28) F(3) 107.4(4) yes . . .
C(1) C(6) H(1) 109.4 no . . .
C(1) C(6) H(2) 109.5 no . . .
C(1) C(6) H(3) 109.5 no . . .
H(1) C(6) H(2) 109.5 no . . .
H(1) C(6) H(3) 109.5 no . . .
H(2) C(6) H(3) 109.5 no . . .
C(2) C(7) H(4) 109.5 no . . .
C(2) C(7) H(5) 109.5 no . . .
C(2) C(7) H(6) 109.5 no . . .
H(4) C(7) H(5) 109.5 no . . .
H(4) C(7) H(6) 109.5 no . . .
H(5) C(7) H(6) 109.5 no . . .
C(3) C(8) H(7) 109.5 no . . .
C(3) C(8) H(8) 109.4 no . . .
C(3) C(8) H(9) 109.5 no . . .
H(7) C(8) H(8) 109.5 no . . .
H(7) C(8) H(9) 109.5 no . . .
H(8) C(8) H(9) 109.5 no . . .
C(4) C(9) H(10) 109.5 no . . .
C(4) C(9) H(11) 109.5 no . . .
C(4) C(9) H(12) 109.5 no . . .
H(10) C(9) H(11) 109.5 no . . .
H(10) C(9) H(12) 109.5 no . . .
H(11) C(9) H(12) 109.5 no . . .
C(5) C(10) H(13) 109.5 no . . .
C(5) C(10) H(14) 109.5 no . . .
C(5) C(10) H(15) 109.5 no . . .
H(13) C(10) H(14) 109.5 no . . .
H(13) C(10) H(15) 109.5 no . . .
H(14) C(10) H(15) 109.5 no . . .
C(11) C(16) H(16) 109.5 no . . .
C(11) C(16) H(17) 109.5 no . . .
C(11) C(16) H(18) 109.5 no . . .
H(16) C(16) H(17) 109.5 no . . .
H(16) C(16) H(18) 109.5 no . . .
H(17) C(16) H(18) 109.5 no . . .
C(12) C(17) H(19) 109.5 no . . .
C(12) C(17) H(20) 109.5 no . . .
C(12) C(17) H(21) 109.5 no . . .
H(19) C(17) H(20) 109.5 no . . .
H(19) C(17) H(21) 109.5 no . . .
H(20) C(17) H(21) 109.5 no . . .
C(13) C(18) H(22) 109.5 no . . .
C(13) C(18) H(23) 109.5 no . . .
C(13) C(18) H(24) 109.5 no . . .
H(22) C(18) H(23) 109.5 no . . .
H(22) C(18) H(24) 109.5 no . . .
H(23) C(18) H(24) 109.5 no . . .
C(14) C(19) H(25) 109.5 no . . .
C(14) C(19) H(26) 109.5 no . . .
C(14) C(19) H(27) 109.4 no . . .
H(25) C(19) H(26) 109.5 no . . .
H(25) C(19) H(27) 109.5 no . . .
H(26) C(19) H(27) 109.5 no . . .
C(15) C(20) H(28) 109.5 no . . .
C(15) C(20) H(29) 109.5 no . . .
C(15) C(20) H(30) 109.5 no . . .
H(28) C(20) H(29) 109.5 no . . .
H(28) C(20) H(30) 109.5 no . . .
H(29) C(20) H(30) 109.5 no . . .
P(1) C(21) H(31) 109.5 no . . .
P(1) C(21) H(32) 109.5 no . . .
P(1) C(21) H(33) 109.5 no . . .
H(31) C(21) H(32) 109.5 no . . .
H(31) C(21) H(33) 109.5 no . . .
H(32) C(21) H(33) 109.5 no . . .
P(1) C(22) H(34) 109.5 no . . .
P(1) C(22) H(35) 109.5 no . . .
P(1) C(22) H(36) 109.5 no . . .
H(34) C(22) H(35) 109.5 no . . .
H(34) C(22) H(36) 109.5 no . . .
H(35) C(22) H(36) 109.5 no . . .
P(1) C(23) H(37) 109.9 no . . .
P(1) C(23) H(38) 109.9 no . . .
P(2) C(23) H(37) 109.9 no . . .
P(2) C(23) H(38) 109.9 no . . .
H(37) C(23) H(38) 109.5 no . . .
P(2) C(24) H(39) 109.5 no . . .
P(2) C(24) H(40) 109.5 no . . .
P(2) C(24) H(41) 109.5 no . . .
H(39) C(24) H(40) 109.5 no . . .
H(39) C(24) H(41) 109.5 no . . .
H(40) C(24) H(41) 109.5 no . . .
P(2) C(25) H(42) 109.5 no . . .
P(2) C(25) H(43) 109.5 no . . .
P(2) C(25) H(44) 109.5 no . . .
H(42) C(25) H(43) 109.5 no . . .
H(42) C(25) H(44) 109.5 no . . .
H(43) C(25) H(44) 109.5 no . . .
Ir(1) C(26) H(45) 115.6 no . . .
Ir(2) C(26) H(45) 115.6 no . . .
C(27) C(26) H(45) 115.6 no . . .
Ir(2) C(27) H(46) 118.1 no . . .
Ir(2) C(27) H(47) 118.1 no . . .
C(26) C(27) H(46) 118.1 no . . .
C(26) C(27) H(47) 118.1 no . . .
H(46) C(27) H(47) 109.5 no . . .
